1 Nonsterile immunity to cryptosporidiosis in infants is associated with mucosal IgA against the  
2 sporozoite and protection from malnutrition  
3 Mamun Kabir<sup>1</sup>, Masud Alam<sup>1</sup>, Uma Nayak<sup>2,3</sup>, Tuhinur Arju<sup>1</sup>, Biplob Hossain<sup>1</sup>, Rubaiya  
4 Tarannum<sup>1</sup>, Amena Khatun<sup>1</sup>, Jennifer A. White<sup>4</sup>, Jennie Z. Ma<sup>2,4</sup>, Rashidul Haque<sup>1</sup>, William A.  
5 Petri Jr<sup>4,5,6\*</sup> and Carol A. Gilchrist<sup>4</sup>

6  
7 <sup>1</sup> International Centre for Diarrhoeal Diseases Research, Bangladesh,

8 <sup>2</sup> Department of Public Health Sciences, University of Virginia, Charlottesville, Virginia, United  
9 States of America

10 <sup>3</sup> Center for Public Health Genomics, University of Virginia, Charlottesville, Virginia, United  
11 States of America,

12 <sup>4</sup> Department of Medicine, University of Virginia, Charlottesville, Virginia, United States of  
13 America

14 <sup>5</sup> Department of Microbiology, Immunology and Cancer Biology, University of Virginia,  
15 Charlottesville, Virginia, United States of America

16 <sup>6</sup> Department of Pathology, University of Virginia, Charlottesville, Virginia, United States of  
17 America

18

19

20

21 **Key words:** Bangladesh; cohort study; cryptosporidiosis; children; sub-clinical, malnourished

22 **\*Corresponding Author**

23 E-mail: wap3g@virginia.edu (WAP)

24

## 25 **Abstract**

26  
27 We conducted a longitudinal study of cryptosporidiosis from birth to three years of age in an  
28 urban slum of Dhaka Bangladesh. Fecal DNA was extracted from monthly surveillance samples  
29 and diarrheal stool samples collected from 392 infants from birth to three years. A pan-  
30 *Cryptosporidium* qPCR assay was used to identify sub-clinical and symptomatic  
31 cryptosporidiosis. Anthropometric measurements were collected quarterly to assess child  
32 nutritional status. 31% (121/392) of children experienced a single and 57% (222/392) multiple  
33 infections with *Cryptosporidium*. Repeat infections had a lower burden of parasites in the stool  
34 (Cq slope = -1.85;  $p < 0.0001$ ) and were more likely to be sub-clinical (Chi square test for trend;  
35  $p = 0.01$ ). Repeat infections were associated with the development of growth faltering (Pearson  
36 correlation = -0.18;  $p = 0.0004$ ). High levels of fecal IgA antibodies against the *Cryptosporidium*  
37 Cp23 sporozoite protein at one year of life were associated with a delay in reinfection and  
38 amelioration of growth faltering through three years of life (HAZ IgA high responders  $-1.323 \pm$   
39  $0.932$  versus HAZ  $-1.731 \pm 0.984$   $p = 0.0001$ ). We concluded that nonsterile immunity to  
40 cryptosporidiosis in young children was associated with high levels of mucosal IgA anti-Cp23  
41 and protection from diarrhea and growth faltering.

42

## 43 **Authors Summary**

44 *Cryptosporidium* is one of the top causes of diarrhea and growth faltering in Bangladesh infants.  
45 We discovered that a prior infection resulted in incomplete immunity that protected from  
46 diarrhea and growth faltering but not infection and was associated with mucosal IgA against a  
47 sporozoite surface protein Cp23. The most important implication of these findings is that a  
48 cryptosporidiosis vaccine may not need to achieve complete protection from infection to have a  
49 beneficial impact on child health.

50

## 51 **Introduction**

52

53 *Cryptosporidium spp.* parasites are leading causes of diarrheal disease in infants living in low  
54 and middle income countries [1–4]. They are additionally a cause of water-borne outbreaks of  
55 diarrhea in high income countries and of chronic diarrhea in people living with HIV infection [5].  
56 There is no vaccine and development will require an understanding of the natural history of  
57 cryptosporidiosis [3,6–12]. To this end, a community-based prospective cohort study of  
58 cryptosporidiosis was begun in 2014 [13]. The study subjects were born in an urban slum in  
59 Dhaka, Bangladesh and enrolled during the first week of life [13–15]. In humans and in animal  
60 models vaccination or prior infection resulted in partial protection against reinfection [16–19].  
61 For example we observed that high fecal IgA against the sporozoite protein Cp23 delayed but  
62 did not prevent a repeat infection with *Cryptosporidium spp.* [20,21]. Ajjampur et al observed a  
63 decrease in the incidence of diarrhea in reinfected children [22]. In contrast Kattula et al found  
64 that while the reinfection frequency was decreased the proportion of symptomatic disease was  
65 unchanged [9]. In human volunteer studies second infections were associated with reduced  
66 parasite burden and less severe diarrhea [23].

67

68 In addition to diarrheal disease cryptosporidiosis is associated with development of malnutrition  
69 [8,24–27]. Here we report the natural history of cryptosporidiosis from a longitudinal study of  
70 urban slum children from birth through three years of age in Dhaka, Bangladesh, demonstrating  
71 that immunity is characterized by protection from diarrhea and growth faltering.

72

## 73 Results

74 Five hundred children were enrolled within the first week of birth, and of these 392 completed  
 75 three years of observation. Stool samples were collected monthly and at the time of diarrhea.  
 76 Successful sample collection and qPCR testing was completed for 96% of monthly surveillance  
 77 time points and for 84% of the diarrheal cases (Fig 1; S1 Table 1). There were 1336  
 78 *Cryptosporidium* positive samples for analysis by year 3 (Fig 1). Six hundred and ninety eight  
 79 events met the definition of separate *Cryptosporidium* infections in the 392 children (Table 1).  
 80 Of the 698 infections experienced by the 392 infants retained in the study at 3 years of age, 167  
 81 were diarrheal and 531 sub-clinical cryptosporidiosis (Table 1). The Cq (cycle of quantification)  
 82 value of the stool sample in which the parasite was first detected was used as an index of  
 83 parasite burden.

84 **Fig 1. COHORT diagram.** Study subjects, collected samples and new infection numbers  
 85 Abbreviations: RT-QPCR quantitative polymerase chain reaction; DS: Diarrheal samples; FU:  
 86 Follow-up; MS: Monthly Samples, Cq: Cycle Quantification

87  
 88 **Table 1 Frequency of Diarrheal Cryptosporidiosis in Repeated Infections**

| Cryptosporidium Infection | Number of infections | Age in days   |            | Infection phenotype* |              | Diarrhea Frequency** |             |             |
|---------------------------|----------------------|---------------|------------|----------------------|--------------|----------------------|-------------|-------------|
|                           |                      | Mean $\pm$ SD | Range      | Diarrhea             | Sub-clinical | Mean                 | Upper limit | Lower limit |
| <b>1<sup>st</sup></b>     | 343                  | 519 $\pm$ 250 | [15-1088]  | 96                   | 247          | 0.28                 | 0.33        | 0.23        |
| <b>2<sup>nd</sup></b>     | 222                  | 758 $\pm$ 209 | [273-1079] | 46                   | 176          | 0.21                 | 0.27        | 0.16        |
| <b>3<sup>rd</sup></b>     | 101                  | 892 $\pm$ 155 | [399-1084] | 17                   | 84           | 0.17                 | 0.26        | 0.10        |
| <b>4<sup>th</sup></b>     | 28                   | 939 $\pm$ 129 | [639-1095] | 6                    | 22           | 0.21                 | 0.41        | 0.08        |

|                 |   |                  |                |   |   |     |      |   |
|-----------------|---|------------------|----------------|---|---|-----|------|---|
| 5 <sup>th</sup> | 3 | 994<br>±<br>72.5 | [929-<br>1072] | 0 | 3 | 0.0 | 0.70 | 0 |
| 6 <sup>th</sup> | 1 | 1067             | 1067           | 0 | 1 | 0.0 | 0.97 | 0 |

89 \*Chi Square test for trend p=0.011 \*\* The frequency of *Cryptosporidium* associated diarrhea and  
 90 range of values \by Chi Square test

91  
 92 To investigate if the reduced severity of clinical disease in recurrent infections could be  
 93 correlated with a reduction in parasite burden, the Cq values of sub-clinical and diarrheal  
 94 disease were measured (Table 2). The slopes derived from the GEE models for sub-clinical (1.9  
 95 ± 0.2) and diarrheal (1.49 ± 0.31) infections were not significantly different from each other (Fig.  
 96 S4). However recurrent infections had as expected a lower amount or burden of  
 97 *Cryptosporidium* than did the first infection (slope -1.85 ± 0.21; p<0.0001) (Fig 2A).

98 **Table 2. Distribution and Clinical Characterization of repeated *Cryptosporidium***  
 99 **infections**

| # of Infections | # of Children | Cryptosporidium infections |           |           |            |           |           |          |           |     |          |     |          | Total # of infections |
|-----------------|---------------|----------------------------|-----------|-----------|------------|-----------|-----------|----------|-----------|-----|----------|-----|----------|-----------------------|
|                 |               | 1st                        |           | 2nd       |            | 3rd       |           | 4th      |           | 5th |          | 6th |          |                       |
|                 |               | DS*                        | MS**      | DS        | MS         | DS        | MS        | DS       | MS        | DS  | MS       | DS  | MS       |                       |
| 0               | 49            | 0                          | 0         | 0         | 0          | 0         | 0         | 0        | 0         | 0   | 0        | 0   | 0        | 0                     |
| 1               | 121           | <b>28</b>                  | <b>93</b> | 0         | 0          | 0         | 0         | 0        | 0         | 0   | 0        | 0   | 0        | <b>121</b>            |
| 2               | 121           | <b>34</b>                  | <b>87</b> | <b>19</b> | <b>102</b> | 0         | 0         | 0        | 0         | 0   | 0        | 0   | 0        | <b>242</b>            |
| 3               | 73            | <b>24</b>                  | <b>49</b> | <b>19</b> | <b>54</b>  | <b>15</b> | <b>58</b> | 0        | 0         | 0   | 0        | 0   | 0        | <b>219</b>            |
| 4               | 25            | <b>8</b>                   | <b>17</b> | <b>7</b>  | <b>18</b>  | <b>1</b>  | <b>24</b> | <b>6</b> | <b>19</b> | 0   | 0        | 0   | 0        | <b>100</b>            |
| 5               | 2             | <b>1</b>                   | <b>1</b>  | <b>1</b>  | <b>1</b>   | <b>1</b>  | <b>1</b>  | 0        | <b>2</b>  | 0   | <b>2</b> | 0   | 0        | <b>10</b>             |
| 6               | 1             | <b>1</b>                   | 0         | 0         | <b>1</b>   | 0         | <b>1</b>  | 0        | <b>1</b>  | 0   | <b>1</b> | 0   | <b>1</b> | <b>6</b>              |
| <b>Total</b>    | <b>392</b>    | 96                         | 247       | 46        | 176        | 17        | 84        | 6        | 22        | 0   | 3        | 0   | 1        | <b>698</b>            |

100

101 **Fig 2 Parasite burden was lower in recurrent infections**

102 **A)** Correlation between parasite burden and the number of *Cryptosporidium* infections. Each  
103 symbol represents the first detectable sample of an individual infection. Y-axis represents the  
104 quantitative cycle (Cq) of the diagnostic pan-*Cryptosporidium* PCR assay. X-axis shows the  
105 number of *Cryptosporidium* infections that had occurred in this child. The line represents the  
106 slope ( $-1.85 \pm 0.21$ ) and Y-intercept ( $26.95 \pm 0.44$ ) estimated from the GEE model with the  
107 exchangeable correlation structure ( $p < 0.0001$ )

108 **B)** Comparison of single infections (black symbol) with those that are part of a series (gray  
109 symbol). Bar graph (indicating data mean  $\pm$  standard deviation) with individual data points. Each  
110 symbol on the box plot represents the first positive sample of an individual infection. X-axis  
111 refers to Infection number and, if the first infection, whether a second *Cryptosporidium* infection  
112 took place in the 3 years of life. Y-axis represents the quantitative cycle (Cq) of the diagnostic  
113 pan-*Cryptosporidium* PCR assay. Horizontal bars represent the result of a non-parametric  
114 Kruskal-Wallis test \*\*\*\* indicates  $p < 0.0001$

115

116 To investigate if an initial high burden infection provided better protection against future  
117 infections with the *Cryptosporidium* parasite, we compared the Cq values of the infections in  
118 children who only had one infection in the first three years of life vs the Cq values of the first  
119 infection in children that had repeated infections (Fig 2B). The mean Cq values were similar in  
120 both cases (single infections: Cq  $27.6 \pm 5.4$ : 1<sup>st</sup> infection of multiples:  $28.8 \pm 6.0$ ) and  
121 significantly lower than that in subsequent second infections where infections were  $>1$  (Cq  
122 second infection:  $31.5 \pm 4.9$ ).

123 We next evaluated if the lower parasite burden in repeat infections was influenced by the age of  
124 the children. As most recurrent *Cryptosporidium* infections occurred in older children, (Table 1)  
125 we analyzed a subset of the *Cryptosporidium* positive samples corresponding to the first to fifth

126 infections in children aged between 2.25 and 2.75 years. The parasite burden measured by  
127 qPCR remained significantly lower in the recurrent infections (Fig 3). The negative relationship  
128 of lower parasite burden with repeated infections was not an artefact of PCR inhibitors in the  
129 stool of older children because detection of the Phocine herpesvirus (PhHV) DNA included as  
130 internal extraction control [29] was not significantly affected by the number of prior  
131 *Cryptosporidium* infections. We concluded that repeat infections had a lower parasite burden.

132

### 133 **Fig 3 Parasite burden in older children**

134 The amount of parasite in stool was determined as a function of the number of *Cryptosporidium*  
135 infections in a child by linear regression. The analysis was restricted to children between 2.25 and  
136 2.75 years of age (n=140). Each symbol represents the first detectable sample of an individual  
137 infection. Y-axis, quantitative cycle of the diagnostic pan-Cryptosporidium PCR assay (Cq). X-  
138 axis, the number *Cryptosporidium* infections that had occurred in each child. Slope: -1.65, R  
139 squared value: 0.01125, Significance  $p < 0.0001$ .

140

141

142 The duration of diarrheal disease was similar in the first infection and later reinfections (single  
143 infection:  $4.8 \pm 2.9$  days; primary infection:  $5.5 \pm 3.9$  days; later infections:  $5.2 \pm 3.6$  days),  
144 however, the proportion of the diarrhea-associated *Cryptosporidium* infections decreased in the  
145 recurrent infections (Chi-squared test for trend  $p = 0.011$ ) (Table 1). We concluded that the  
146 repeated *Cryptosporidium* infections were more likely to be sub-clinical.

147

### 148 ***Cryptosporidium* and growth faltering**

149 Growth faltering (low height for age; HAZ score) was analyzed from the 3 year old children  
150 based on the number of *Cryptosporidium spp.* infections [0 - 3 years] (both diarrhea and sub-

151 clinical) (Table 2, Fig S5 & 6). The association between cryptosporidiosis and HAZ score at  
152 three years was examined by multiple regression in order to account for the effect of the  
153 confounding variables previously identified (Table 3) [13,21].

154  
155 **Table 3 Regression Analysis using selected predictors to test the association of**  
156 **Cryptosporidiosis with Height-for-Age Scores at 3 Years**

| Parameter                  | Effect (95% Confidence Interval) | P Value |
|----------------------------|----------------------------------|---------|
| Cryptosporidium Infections | -0.12 (-0.197, -0.043)           | 0.0024  |
| Child LAZ at Birth         | 0.252 (0.159, 0.345)             | <0.0001 |
| Maternal Weight            | 0.017 (0.007, 0.027)             | 0.0011  |
| Maternal Height            | 0.037 (0.018, 0.055)             | <0.0001 |
| Maternal Education         | 0.237 (0.027, 0.448)             | 0.0273  |
| Household income           | 0.001 (0.000, 0.002)             | 0.1527  |
| Treated water              | 0.163 (-0.045, 0.371)            | 0.1234  |

158  
159 *Cryptosporidium* infection was negatively associated with the HAZ score at 3 years after  
160 adjusting for birth length-for-age (LAZ) score and maternal weight and education: each  
161 *Cryptosporidium* infection reoccurrence resulted in a decrease in HAZ score ( $\Delta$  0.12) at 3 years  
162 (Table 5). No significant relation was found between malnutrition at birth (LAZ score) and total  
163 number of *Cryptosporidium* infections during the follow-up (Fig 4A). However, the total number  
164 of *Cryptosporidium* infections was negatively associated with HAZ score at 3 years (Fig 4B,  
165 regression coef=-0.152, p=0.0004) The association between HAZ and *Cryptosporidium spp.*  
166 infections was unaffected by whether the event was a sub-clinical infection or diarrheal disease  
167 (Fig S7).

168 **Fig 4 Cryptosporidiosis frequency was associated with growth faltering distinct from the**  
169 **impact of birth nutritional status**

170 A) Relationship between length for age z score (LAZ) at birth (Y-axis) and the total number of  
171 *Cryptosporidium spp.* infections (X-axis). The slope was not significantly different from one.



172 B) Relationship between height for age z score (HAZ) at 3 years (Y-axis) and the total number  
173 of *Cryptosporidium spp.* infections (X-axis). Slope:  $-0.152 \pm 0.0429$ , R squared value: 0.0313,  
174 Significance  $p=0.0004$ . Children were defined to be at risk for growth faltering with a LAZ or  
175 HAZ score  $<-1$  and malnourished at LAZ or HAZ score  $<-2$ . Orange box: birth LAZ or 3 year  
176 HAZ score  $-1$  to  $-2$ ; red box: birth LAZ or 3 year HAZ or score  $<-2$ .

177  
178 Other measurements that are used as indicators of malnutrition were also significantly  
179 associated with the number of *Cryptosporidium* infections. These included mid-upper arm  
180 circumference (MUAC) (Fig S8A; MUACZ vs. number of *Cryptosporidium* infections slope: -  
181 0.088;  $p=0.0123$  and weight-for-age (WAZ score) (Fig S8B) (linear regression analysis slope: -  
182 0.115  $p=0.0093$ ). However, neither BAZ (body-mass- for- age) (Fig S8C), used to measure  
183 acute protein-energy malnutrition or wasting (WHZ) were affected by a history of  
184 *Cryptosporidium* infections (Fig S8D).

185 The Pearson correlations among the number of *Cryptosporidium* infections, LAZ at birth,  
186 diarrheal episodes and HAZ at year 3 are shown in Fig 5A (*Cryptosporidium* infections: HAZ at  
187 year 3: coef =  $-0.18$ ,  $p=0.024$ ; *Cryptosporidium* infections: diarrheal episodes captured (all  
188 causes): coef =  $0.22$ ,  $p>0.0001$ ; HAZ at year 3: LAZ at birth: coef =  $0.28$ ,  $p= 0.008$ ). As  
189 expected, a significant correlation existed between LAZ at birth and HAZ at year 3 (simple linear  
190 regression  $p<0.0001$  Fig 5B).

191 Enteric pathogens are endemic in the Bangladesh study population [30] and as a consequence,  
192 infants enrolled in the study cohort had repeated diarrheal episodes of which only some were  
193 associated with infection with the *Cryptosporidium* parasite. However, while *Cryptosporidium*  
194 infections (diarrheal and sub-clinical) were significantly associated with child HAZ at year 3  
195 (Pearson's correlation  $p=0.0004$ ), the number of all-cause diarrheal episodes was not (Fig 5C;  
196 S2 Table 3). This result supported our conclusion that this growth shortfall was specifically  
197 associated with recurrent cryptosporidiosis.

198

199 **Fig 5 Correlates of cryptosporidiosis-associated growth-faltering**

200 A) Correlation matrix of cryptosporidiosis, all-cause diarrhea, LAZ at birth and HAZ at 3 years,  
201 calculated using Pearson r. Bar on the right indicates strength and direction of association. B)  
202 Comparison of three year-HAZ with birth LAZ. (Slope:  $-0.294 \pm 0.05$ ; R squared value: 0.08;  
203 Significance  $p < 0.0001$ ). C) Relationship of all-cause diarrhea with HAZ at 3 years of age ( $p =$   
204 NS).

205 **Mucosal IgA against the sporozoite Cp23 protein was associated with protection from**  
206 **growth faltering**

207 In previous work it was shown in this cohort that a high level ( $>$  mean value) of fecal anti-Cp23  
208 IgA at one year of age was associated with an increased resistance to cryptosporidiosis through  
209 age three [14,20]. Here we additionally discovered that children with high levels (upper 50<sup>th</sup>  
210 percentile) of fecal anti-Cp23 IgA at one year of age were protected from growth faltering  
211 through year 3 (Fig 6). Subgrouping the children into Group 2a (never infected by evidence of  
212 anti-Cp23 IgA levels and diagnostic qPCR assays;  $n=20$ ) and Group 2b (diagnostic qPCR  
213 positive only;  $n=185$ ) versus Group 1 children with high levels of IgA at one year ( $n=171$ ) did not  
214 alter the association with growth faltering (Fig S9A). Analysis of the fecal IgA antibodies against  
215 a second sporozoite peptide (Cp17) was also performed. Although a similar trend was observed  
216 the difference in year 3 HAZ was not significantly different (Fig S9B). A high level of fecal anti-  
217 Cp23 at one year was not associated with any drop in the parasite burden at the next  
218 *Cryptosporidium* infection (first subsequent new infection: Cq of IgA high responders  $28.2 \pm 5.6$   
219 versus  $27.6 \pm 5.6$   $p=0.43$ ).

220

221 **Fig 6 High anti-Cp23 IgA levels were associated with a reduction in cryptosporidiosis-**  
222 **associated growth-faltering.**

223 Group 1 and 2 children were in the upper and lower 50th percentile for fecal IgA anti-Cp23  
224 respectively. HAZ are shown for children in both year one and year three of life. Mean  $\pm$   
225 standard deviation with individual data points. Horizontal bars represent the result of a non-  
226 parametric Kruskal-Wallis test \*\*\* $p < 0.001$ , \*\* $p < 0.01$

## 227 **Discussion**

228 The key finding of this paper is that naturally acquired immunity protects from *Cryptosporidium*  
229 diarrhea but does not provide sterilizing immunity. The importance of this observation is two-  
230 fold: first it indicates that transmission likely occurs in semi-immune populations; and second  
231 that continued sub-clinical infections increase the risk of infection-related growth faltering.  
232 Encouragingly however, acquired immunity associated with high levels of mucosal IgA against  
233 the Cp23 cryptosporidium sporozoite antigen were associated with protection from malnutrition.  
234

235 Many previous studies on cryptosporidiosis have focused on the health impact of diarrhea-  
236 associated cryptosporidiosis [7,12,31–34]. However sub-clinical disease, as opposed to  
237 infection accompanied by diarrhea, may also have long term effects on child health. The link  
238 between sub-clinical cryptosporidiosis and malnutrition is now well known if not yet well  
239 understood [8,9,13,32]. In a recent study the global prevalence of cryptosporidiosis in people  
240 without diarrheal symptoms was 4.4% (95% confidence interval 2.9 - 6.3)[35]. During the 3  
241 years of this study 212 children (54%) had only sub-clinical *Cryptosporidium* infections. This  
242 longitudinal study allowed us to take an in depth look at the role of sub-clinical reinfections in the  
243 exacerbation of growth faltering [13,22,25].

244 Anthropometric measurements are reliable non-invasive methods to monitor child malnutrition.  
245 The most commonly used metrics are a shortfall in child growth (low height for age: HAZ score)  
246 a consequence of chronic undernutrition and wasting (exemplified by a low weight for height:

247 WHZ score). In line with most studies our results show that a history of cryptosporidiosis was  
248 associated with a decrease in the HAZ score of children irrespective of infection severity  
249 [8,26,36,37] . Here we found that child growth was negatively impacted not only by the first  
250 episode of cryptosporidiosis, but both occurred and remained constant in succeeding infections,  
251 even though parasite burden and diarrheal disease decreased. This study has, therefore, shown  
252 that naturally acquired partial immunity was not effective at preventing growth faltering and that  
253 a control strategy focused on only preventing diarrheal cryptosporidiosis may not prevent the  
254 stunted growth associated with cryptosporidiosis.

255 A limitation of the current study is that it was not possible to unambiguously attribute an episode  
256 of diarrhea to *Cryptosporidium* because children in this community were infected with multiple  
257 enteropathogens at the same time [26,30]. To mitigate the problem of correctly identifying  
258 *Cryptosporidium*-associated diarrheal infections these were defined as an episode of diarrhea  
259 accompanied by a new *Cryptosporidium* infection (i.e. the immediately preceding surveillance or  
260 diarrheal stool sample was negative for *Cryptosporidium*) [13]. A second limitation was that  
261 surveillance stool samples were collected at only monthly intervals which likely missed some  
262 subclinical infections, potentially underestimating the impact of cryptosporidiosis on child  
263 growth. The study however had notable strengths including most importantly its longitudinal  
264 design that combined collection of surveillance and clinical specimens with studies on child  
265 growth faltering.

266 The association of mucosal immunity to Cp23 with protection from growth faltering offers hope  
267 that a cryptosporidiosis vaccine could have a measurable impact on child health, even in the  
268 absence of absolute protection from infection.

269

## 270 **Acknowledgement**

271 We are grateful for the participation of the parents and children in this study as well as the staff of  
272 the Emerging Infectious Diseases Division of icddr,b for contributing to this research.

## 273 **Author Contributions**

274 CG, MK, RH and WP designed, and RH, WP, MA, JAW, CG and MK drafted the study protocols  
275 and WP directed the work described in this paper. MK, TA, BH, RT and AK acquired the data  
276 used in this manuscript. UN curated the study data. UN, JM, MK and CG analyzed the study data.  
277 CG wrote the first draft of the manuscript that was reviewed and amended by all the authors who  
278 also approved the final manuscript.

## 279 **Methods**

### 280 **Child cohort**

281 A total of 500 children were enrolled within one week of birth in an urban slum of Dhaka,  
282 Bangladesh beginning in June 2014 through March 2016 and were monitored for diarrheal  
283 diseases through bi-weekly home visits by trained field investigators. A monthly stool sample  
284 was also collected to evaluate asymptomatic infection and growth was measured every 3  
285 months (“Cryptosporidiosis and Enteropathogens in Bangladesh”; ClinicalTrials.gov identifier  
286 NCT02764918). This area (Section 11 of Mirpur Thana) is densely populated with participants in  
287 this study having an average of 5.5 people living in 1.6 rooms. Annual median household  
288 income of participants was 14,000 Taka or approximately US \$164 (Table 4). Anthropometric  
289 data was collected as previously described [13]. Each child was weighed on an electronic scale  
290 (kilograms, measured with electronic scale; TANITA, HD-314). Child height or length  
291 (depending on age) and mid-upper arm circumference were measured to the nearest 0.1 cm  
292 using a measuring board and plastic tape (Table 5). The height-for-age z score (HAZ); weight

293 for age z score (WAZ); weight for height (WHZ); body mass index for age (BAZ); and mid-upper  
 294 arm circumference for age (MUACZ) were calculated using the World Health Organization  
 295 Anthro software (version 3.2.2) [13]. Children who had a HAZ score <-1 were defined as 'at risk  
 296 for malnutrition' and HAZ < -2 as malnourished [27,28]. Diarrhea was defined as ≥3 loose  
 297 stools within a 24-hour period as reported by the child's caregiver with episodes separated by a  
 298 gap of at least 3 days. This paper reports the data from 392 infants who were followed through  
 299 three years of age.

300 **Table 4 Maternal and family demographics**

| <b>Maternal and Family Characteristics</b> | <b>N=392</b>    |
|--------------------------------------------|-----------------|
| Mean Maternal Age, year (SD)               | 24.63 ( 4.68)   |
| Mean Maternal Weight, Kg (SD)              | 51.82 (10.17)   |
| Mean Maternal Height, Cm (SD)              | 149.71 (5.03)   |
| Mean Maternal BMI, kg/m <sup>2</sup> (SD)  | 23.10 (4.32)    |
| No Maternal Education, N (%)               | 87 (22.2)       |
| Median Household income (BDT*) (IQR)       | 14,000 (10,000) |
| Treated water (Boil), N (%)                | 390 (74.0)      |

301 **Abbreviations:** SD, Standard Deviation; BDT, Bangladesh Taka; IQR, Inter  
 302 Quartile Range

303 \*1000 BDT is approximately 12 US dollars

304

305

306 **Table 5 Infant demographic characteristics**

307

| <b>Infant Demographic Characteristics</b> | <b>Year 2<br/>N=421</b> | <b>Year 3<br/>N=392</b> |
|-------------------------------------------|-------------------------|-------------------------|
| Gender, Female N (%)                      | 229 (54.4)              | 214 (54.6)              |
| Mean Infant Age in days, Range            | 733 (719 - 783)         | 1099 (1035 - 1134)      |
| Mean Weight, Kg, (SD)                     | 10.17 (1.31)            | 11.93 (1.52)            |
| Mean Height, Cm, (SD)                     | 81.72 (3.18)            | 89.78 (3.74)            |
| Mean MUAC, Cm, (SD)                       | 14.87 (1.02)            | 15.3 (1.00)             |
| Mean WAZ, (SD)                            | -1.34 (1.05)            | -1.42 (0.99)            |
| Mean HAZ, (SD)                            | -1.56 (0.98)            | -1.54 (0.98)            |
| Mean MUACZ, (SD)                          | -0.15 (0.85)            | -0.34 (0.79)            |

|                |              |              |
|----------------|--------------|--------------|
| Mean BAZ, (SD) | -0.52 (0.98) | -0.63 (0.91) |
|----------------|--------------|--------------|

308 **Abbreviations:** SD, Standard Deviation, MUAC, Mid Upper Arm Circumference, WAZ, Weight-  
309 for-age, HAZ, Height-for-age, MUACZ, Mid Upper Arm Circumference-for-age, BAZ, body mass  
310 index-for-age  
311

## 312 **Ethics Statement**

313 The study was approved by the Ethical and Research Review Committees of the International  
314 Centre for Diarrhoeal Disease Research, Bangladesh (PR-13092) and by the Institutional  
315 Review Board of the University of Virginia (IRB#20388) . Informed written consent was obtained  
316 from the parents or guardians for the participation of the subjects in the study.

## 317 **Sampling and specimen testing**

318  
319 Fresh stool samples collected in the field were placed on ice and then brought to the lab on the  
320 same day and frozen within 6 h of collection (Fig S1). Stool specimens were collected from  
321 children every month (monthly surveillance) and during episodes of diarrhea. A modified  
322 Qiagen stool DNA extraction protocol with 95°C incubation and a 3-minutes bead-beating step  
323 was used to extract DNA [13](Fig S2). These samples were tested with a multiplex qPCR  
324 assay which utilizes pan-Cryptosporidium primers and probes targeting the 18S rDNA gene and  
325 primers and probes to detect the Phocine herpesvirus (PhHV) extraction control (obtained from  
326 the European Virus Archive Global organization) as previously described (Fig S3). All samples  
327 with a cycle threshold of  $\leq 40$  for cryptosporidium were used in this analysis [13]. In year 3 the  
328 diagnostic qPCR assay was not able to be completed on 0.9% of the collected diarrheal and  
329 4.6% of the monthly surveillance samples (Table S1 ).

330 Infection with *Cryptosporidium* was defined as detection of *Cryptosporidium* DNA by qPCR from  
331 stool. PCR- positive samples were classified as a separate infection if occurring greater than 65  
332 days after the preceding positive sample [13]. The *Cryptosporidium* infection phenotype

333 (diarrheal or sub-clinical) was based upon symptoms at the time of detection of the first  
334 *Cryptosporidium* - positive stool sample, whether diarrheal stool or monthly surveillance.

### 335 **Statistical analysis**

336 Descriptive statistics were expressed in mean  $\pm$  standard deviation for continuous variables and  
337 as frequencies and proportions for categorical variables. The frequency of repeated  
338 *Cryptosporidium* infections in the first 3 years of life was summarized for diarrhea and sub-  
339 clinical infections separately and their differences were evaluated with the  $\chi^2$  test. To account for  
340 within-child correlations among repeated *Cryptosporidium* infections, the relationship between  
341 parasite burden and the number of repeated *Cryptosporidium* infections was evaluated using  
342 the Generalized Estimating Equation (GEE) for repeated measurements, assuming an  
343 exchangeable correlation structure. Pearson correlation was calculated for univariate  
344 association of individual predictors with HAZ at 3 years. Since confounders such as LAZ at birth,  
345 maternal weight and height, maternal education, household income and access to treated water  
346 were previously shown to impact HAZ [8,13], a multivariable linear regression was performed to  
347 evaluate the association between *Cryptosporidium* infection and HAZ at 3 years after adjusting  
348 for these factors (Table 3). Similarly, a multiple regression analysis was performed to  
349 independently evaluate whether the number of episodes of diarrhea, irrespective of the  
350 causative pathogen, was associated with HAZ at 3 years. Analyses were performed using both  
351 the GraphPad Prism version 8.4.3 for Mac, (GraphPad Software, San Diego, California USA, ),  
352 SAS 9.4 (Raleigh, NC) and R version 3.3.3, 32-bit.

353

354



355 **Funding**

356 This work was supported by grants NIH R01-043596 to WP and CG, R21-142656 to CG and the  
357 Bill & Melinda Gates Foundation OPP1100514 to WP. The governments of Bangladesh,  
358 Canada, Sweden, and the UK provide core support to icddr,b. The funders had no role in study  
359 design, data collection and analysis or decision to submit for publication.

360

361

362 References

- 363 1. Sow SO, Muhsen K, Nasrin D, Blackwelder WC, Wu Y, Farag TH, et al. The Burden of  
364 Cryptosporidium Diarrheal Disease among Children &lt; 24 Months of Age in  
365 Moderate/High Mortality Regions of Sub-Saharan Africa and South Asia, Utilizing Data  
366 from the Global Enteric Multicenter Study (GEMS). Kosek M, editor. PLoS Negl Trop Dis.  
367 2016;10: e0004729. doi:10.1371/journal.pntd.0004729
- 368 2. Wang H, Abajobir AA, Abate KH, Abbafati C, Abbas KM, Abd-Allah F, et al. Global,  
369 regional, and national under-5 mortality, adult mortality, age-specific mortality, and life  
370 expectancy, 1970–2016: a systematic analysis for the Global Burden of Disease Study  
371 2016. Lancet. 2017;390: 1084–1150. doi:10.1016/S0140-6736(17)31833-0
- 372 3. Korpe PS, Valencia C, Haque R, Mahfuz M, McGrath M, Houpt E, et al. Epidemiology  
373 and Risk Factors for Cryptosporidiosis in Children from Eight Low-income Sites: Results  
374 from the MAL-ED Study. Clin Infect Dis. 2018; doi:10.1093/cid/ciy355
- 375 4. Haque R, Mondal D, Karim A, Molla IH, Rahim A, Faruque ASG, et al. Prospective case-  
376 control study of the association between common enteric protozoal parasites and  
377 diarrhea in Bangladesh. Clin Infect Dis. 2009;48: 1191–1197. doi:10.1086/597580
- 378 5. Cama V a, Ross JM, Crawford S, Kawai V, Chavez-Valdez R, Vargas D, et al.  
379 Differences in clinical manifestations among Cryptosporidium species and subtypes in  
380 HIV-infected persons. J Infect Dis. 2007;196: 684–91. doi:10.1086/519842
- 381 6. Chalmers RM, Davies AP, Tyler K. Cryptosporidium. Microbiol (United Kingdom).  
382 2019;165: 500–502. doi:10.1099/mic.0.000764
- 383 7. Chavez MA, White AC. Novel treatment strategies and drugs in development for  
384 cryptosporidiosis. Expert Review of Anti-Infective Therapy. Taylor and Francis Ltd; 2018.  
385 pp. 655–661. doi:10.1080/14787210.2018.1500457
- 386 8. Korpe P, Haque R, Gilchrist CA, Valencia C, Niu F, Lu MM, et al. Natural History of  
387 Cryptosporidiosis in a Longitudinal Study of Slum-Dwelling Bangladeshi Children:  
388 Association with Severe Malnutrition. PLoS Negl Trop Dis. 2016;10: e0004564.  
389 doi:10.1371/journal.pntd.0004564
- 390 9. Kattula D, Jeyavelu N, Prabhakaran AD, Premkumar PS, Velusamy V, Venugopal S, et  
391 al. Natural History of Cryptosporidiosis in a Birth Cohort in Southern India. Clin Infect Dis.  
392 2017;64: 347–354. doi:10.1093/cid/ciw730
- 393 10. Khalil IA, Troeger C, Rao PC, Blacker BF, Brown A, Brewer TG, et al. Morbidity, mortality,  
394 and long-term consequences associated with diarrhoea from Cryptosporidium infection in  
395 children younger than 5 years: a meta-analyses study. Lancet Glob Heal. 2018;6: e758–  
396 e768. doi:10.1016/S2214-109X(18)30283-3

- 397 11. Krumkamp R, Aldrich C, Maiga-Ascofare O, J M, Rakotozandrindrainy N, Borrmann S, et  
398 al. Transmission of *Cryptosporidium* spp. among human and animal local contact  
399 networks in sub-Saharan Africa: a multi-country study. *Clin Infect Dis*. 2020; ciaa223.  
400 Available: <https://pubmed.ncbi.nlm.nih.gov/32150243/>
- 401 12. Eibach D, Krumkamp R, Al-Emran HM, Sarpong N, Hagen RM, Adu-Sarkodie Y, et al.  
402 Molecular characterization of *Cryptosporidium* spp. among children in rural Ghana. *PLoS*  
403 *Negl Trop Dis*. 2015;9: e0003551. doi:10.1371/journal.pntd.0003551
- 404 13. Steiner KL, Ahmed S, Gilchrist CA, Burkey C, Cook H, Ma JZ, et al. Species of  
405 *Cryptosporidia* Causing Subclinical Infection Associated With Growth Faltering in Rural  
406 and Urban Bangladesh: A Birth Cohort Study. *Clin Infect Dis*. 2018;67: 1347–1355.  
407 doi:10.1093/cid/ciy310
- 408 14. Steiner KL, Kabir M, Hossain B, Gilchrist CA, Ma JZ, Ahmed T, et al. Delayed Time to  
409 *Cryptosporidiosis* in Bangladeshi Children is Associated with Greater Fecal IgA against  
410 Two Sporozoite-Expressed Antigens. *Am J Trop Med Hyg*. 2021;104: 229–232.  
411 doi:10.4269/ajtmh.20-0657
- 412 15. Taniuchi M, Sobuz SU, Begum S, Platts-Mills JA, Liu J, Yang Z, et al. Etiology of  
413 Diarrhea in Bangladeshi Infants in the First Year of Life Using Molecular Methods. *J Infect*  
414 *Dis*. 2013;e-pub ahea: jit507-. doi:10.1093/infdis/jit507
- 415 16. Lemieux MW, Sonzogni-Desautels K, Ndao M. Lessons learned from protective immune  
416 responses to optimize vaccines against cryptosporidiosis [Internet]. *Pathogens*. MDPI  
417 AG; 2018. doi:10.3390/pathogens7010002
- 418 17. Sateriale A, Šlapeta J, Baptista R, Engiles JB, Gullicksrud JA, Herbert GT, et al. A  
419 Genetically Tractable, Natural Mouse Model of *Cryptosporidiosis* Offers Insights into Host  
420 Protective Immunity. *Cell Host Microbe*. 2019;26: 135-146.e5.  
421 doi:10.1016/j.chom.2019.05.006
- 422 18. Checkley W, White AC, Jaganath D, Arrowood MJ, Chalmers RM, Chen X-MM, et al. A  
423 review of the global burden, novel diagnostics, therapeutics, and vaccine targets for  
424 *cryptosporidium*. *Lancet Infect Dis*. 2015;15: 85–94. doi:10.1016/S1473-3099(14)70772-8
- 425 19. Tzipori S, Robertson D, Chapman C. Remission of diarrhoea due to cryptosporidiosis in an  
426 immunodeficient child treated with hyperimmune bovine colostrum. *Br Med J* . 1986;293:  
427 1276–7. Available:  
428 [http://www.pubmedcentral.nih.gov/articlerender.fcgi?artid=1342109&tool=pmcentrez&ren](http://www.pubmedcentral.nih.gov/articlerender.fcgi?artid=1342109&tool=pmcentrez&rendertype=abstract)  
429 [dertype=abstract](http://www.pubmedcentral.nih.gov/articlerender.fcgi?artid=1342109&tool=pmcentrez&rendertype=abstract)
- 430 20. Steiner KL, Kabir M, Priest JW, Hossain B, Gilchrist CA, Cook H, et al. Fecal IgA against  
431 a sporozoite antigen at 12 months is associated with delayed time to subsequent  
432 cryptosporidiosis in urban Bangladesh: a prospective cohort study. *Clin Infect Dis*. 2019;

- 433           doi:10.1093/cid/ciz430
- 434   21.   Steiner KL, Kabir M, Priest JW, Hossain B, Gilchrist CA, Cook H, et al. Fecal  
435       immunoglobulin a against a sporozoite antigen at 12 months is associated with delayed  
436       time to subsequent cryptosporidiosis in urban Bangladesh: A prospective cohort study.  
437       Clin Infect Dis. 2020;70: 323–326. doi:10.1093/cid/ciz430
- 438   22.   Ajjampur SSR, Sarkar R, Sankaran P, Kannan A, Menon VK, Muliyl J, et al. Symptomatic  
439       and asymptomatic *Cryptosporidium* infections in children in a semi-urban slum  
440       community in southern India. Am J Trop Med Hyg. 2010;83: 1110–5.  
441       doi:10.4269/ajtmh.2010.09-0644
- 442   23.   Okhuysen PC, Chappell CL, Sterling CR, Jakubowski W, DuPont HL. Susceptibility and  
443       serologic response of healthy adults to reinfection with *Cryptosporidium parvum*. Infect  
444       Immun. 1998;66: 441–443. doi:10.1128/iai.66.2.441-443.1998
- 445   24.   Guerrant DI, Moore SR, Lima AAM, Patrick PD, Schorling JB, Guerrant RL. Association  
446       of early childhood diarrhea and cryptosporidiosis with impaired physical fitness and  
447       cognitive function four-seven years later in a poor urban community in northeast Brazil.  
448       Am J Trop Med Hyg. 1999;61: 707–713. doi:10.4269/ajtmh.1999.61.707
- 449   25.   Checkley W, Gilman RH, Epstein LD, Suarez M, Diaz JF, Cabrera L, et al. Asymptomatic  
450       and symptomatic cryptosporidiosis: their acute effect on weight gain in Peruvian children.  
451       Am J Epidemiol. 1997;145: 156–63. doi:10.1093/oxfordjournals.aje.a009086
- 452   26.   Schnee AE, Haque R, Taniuchi M, Uddin J, Alam M, Liu J, et al. Identification of etiology-  
453       specific diarrhea associated with linear growth faltering in Bangladeshi infants. Am J  
454       Epidemiol. 2018;187: 2210–2218. doi:10.1093/aje/kwy106
- 455   27.   de Onis M, Branca F. Childhood stunting: A global perspective. Matern Child Nutr.  
456       2016;12: 12–26. doi:10.1111/mcn.12231
- 457   28.   Guide I. Interpretation Guide. Nutr Landcape Inf Syst. 2012; 1–51.  
458       doi:10.1159/000362780.Interpretation
- 459   29.   Liu J, Platts-Mills JA, Juma J, Kabir F, Nkeze J, Okoi C, et al. Use of quantitative  
460       molecular diagnostic methods to identify causes of diarrhoea in children: a reanalysis of  
461       the GEMS case-control study. Lancet. 2016;388: 1291–1301. doi:10.1016/S0140-  
462       6736(16)31529-X
- 463   30.   Taniuchi M, Sobuz SU, Begum S, Platts-Mills JA, Liu J, Yang Z, et al. Etiology of diarrhea  
464       in Bangladeshi infants in the first year of life analyzed using molecular methods. J Infect  
465       Dis. 2013;208: 1794–802. doi:10.1093/infdis/jit507

- 466 31. Platts-Mills JA, Liu J RE et al. Aetiology, burden and clinical characteristics of diarrhea in  
467 children in low-resource settings using quantitative molecular diagnostics: results from  
468 the MAL-ED cohort study. *Lancet Glob Heal*. 2018;in press.
- 469 32. Cama VA, Bern C, Roberts J, Cabrera L, Sterling CR, Ortega Y, et al. *Cryptosporidium*  
470 species and subtypes and clinical manifestations in children, Peru. *Emerg Infect Dis*.  
471 2008;14: 1567–74. doi:10.3201/eid1410.071273
- 472 33. Chappell CL, Okhuysen PC, Langer-Curry RC, Akiyoshi DE, Widmer G, Tzipori S.  
473 *Cryptosporidium meleagridis*: Infectivity in healthy adult volunteers. *Am J Trop Med Hyg*.  
474 2011;85: 238–242. doi:10.4269/ajtmh.2011.10-0664
- 475 34. Ajjampur SSR, Liakath FB, Kannan A, Rajendran P, Sarkar R, Moses PD, et al. Multisite  
476 study of cryptosporidiosis in children with diarrhea in India. *J Clin Microbiol*. 2010;48:  
477 2075–81. doi:10.1128/JCM.02509-09
- 478 35. Dong S, Yang Y, Wang Y, Yang D, Yang Y, Shi Y, et al. Prevalence of *Cryptosporidium*  
479 Infection in the Global Population: A Systematic Review and Meta-analysis. *Acta*  
480 *Parasitol*. 2020; doi:10.2478/s11686-020-00230-1
- 481 36. Hossain MJ, Saha D, Antonio M, Nasrin D, Blackwelder WC, Ikumapayi UN, et al.  
482 *Cryptosporidium* infection in rural Gambian children: Epidemiology and risk factors.  
483 Bartelt LA, editor. *PLoS Negl Trop Dis*. 2019;13: e0007607.  
484 doi:10.1371/journal.pntd.0007607
- 485 37. Bushen OY, Kohli A, Pinkerton RC, Dupnik K, Newman RD, Sears CL, et al. Heavy  
486 cryptosporidial infections in children in northeast Brazil: comparison of *Cryptosporidium*  
487 *hominis* and *Cryptosporidium parvum*. *Trans R Soc Trop Med Hyg*. 2007;101: 378–84.  
488 doi:10.1016/j.trstmh.2006.06.005

489

490

491 **Supplemental Figures and Tables**

492

493 Table S1. **Symptomatic and asymptomatic samples collected during year 3**

494

495 Table S2. **Multivariable analysis of total all cause diarrhea and HAZ at year 3**

496

497 Fig S1. **Flow chart of stool processing and molecular testing**

498

499 Fig S2. **Flow chart of stool TNA extraction procedure using QIAamp Fast DNA Stool Mini Kit from fresh or frozen stool samples.**

500

501 Fig S3. **Flow chart of Multiplex qPCR of *Cryptosporidium*, *Giardia*, *Entamoeba histolytica* by targeting the 18S gene**

502

503 Fig S4. **Parasite Burden in diarrheal and sub-clinical infections**

504

505 Relationship between Parasite Burden and the number of recurrent *Cryptosporidium* infections. Each symbol represents the first detectable sample of an individual infection. Y-axis, quantitative cycle of the diagnostic pan-*Cryptosporidium* PCR assay (Cq). X-axis, the total number of *Cryptosporidium* infections. The infection was designated as either diarrheal (red) or sub-clinical (green) based on the current infection phenotype. The data from diarrheal cases was offset to improve data visualization. To account for within-child correlations among repeated *Cryptosporidium* infections, the generalized estimating equation (GEE) method for repeated measurements were used with exchangeable correlation structure. As the intercept of the diarrheal and sub-clinical models was not statistically different the common intercept ( $27.02 \pm 0.45$ ) was used. The slope of the data derived from the sub-clinical ( $1.9 \pm 0.2$ ) and diarrheal ( $1.49 \pm 0.31$ ) exchangeable models were not significantly different from each other ( $p=0.071$ ) although both were statistically different from zero ( $p<0.0001$ ).

518

519 Fig S5. **Distribution of repeated *Cryptosporidium* infections**

520

521 x axis child age in months; left y-axis child HAZ scores; right y-axis frequency of *Cryptosporidium* (diarrheal and sub-clinical) infections (shown as the number that occurred per the age of the child in months). All graphs include as a reference the HAZ score of children where no *Cryptosporidium* infections were detected (green circle and line). *Cryptosporidium* infections: Light blue triangle dotted blue connection line: infection one; purple circle and dotted line: infection two; light red square and dotted line: infection three; black triangle and dotted line: infection four A) blue symbol and solid line HAZ score of children who had one *Cryptosporidium* infections by 3 years of age B) purple square and solid line HAZ score of children who had two *Cryptosporidium* infections by three years of age C) red square and solid line HAZ score of children who had three *Cryptosporidium* infections by three years of age D) black square and solid line HAZ score of children who had four *Cryptosporidium* infections by three years of age

531

532

533 Fig S6. **Recurrent cryptosporidiosis results in greater growth faltering** Each symbol represents a single child. Box plot comparing the height for age z score at 3 years (HAZ) (Y-axis) mean and standard deviation shown Children were considered to be at Risk for malnutrition if they have a HAZ score  $<-1$  and malnourished at HAZ-2: orange box: 3-year HAZ score  $-1$  to  $-2$ ; red box 3-year HAZ score  $<-2$ . X-axis Number of *Cryptosporidium* infections. Bar

537

538 indicates the result of a non-parametric Kruskal-Wallis test for multiple comparisons \* indicates  
539  $p < 0.05$  \*\* indicates  $p < 0.01$

540

541

542 **Fig S7. Comparison of Cryptosporidiosis associated Growth-faltering in diarrheal and**  
543 **sub-clinical infections**

544 Graphs show results from a simple linear regression with each symbol representing a single  
545 child. Black symbols represent children who were never infected or had sub-clinical infections.  
546 The blue symbols indicate children who have had one or more than one episodes of diarrhea-  
547 associated cryptosporidiosis. Height for age (HAZ) z score at 3 years is shown on the Y-axis.  
548 The slope of the diarrheal-associated and sub-clinical groups are identical. Pooled Slope: -  
549 0.1545. Children are considered to be at Risk for malnutrition if they have a HAZ score  $< -1$  and  
550 malnourished at HAZ  $-2$ : orange box: 3-year HAZ score  $-1$  to  $-2$  ; red box: 3-year HAZ score  $< -$   
551  $2$ . X-axis indicates number of *Cryptosporidium* infections

552

553 **Fig S8. Cryptosporidiosis was associated with chronic but not acute malnutrition at year**  
554 **3**

555 Graphs show results from a simple linear regression with each symbol representing a single  
556 child X-axis indicates number of *Cryptosporidium* infections A) Y-axis MUACZ circumference of  
557 the mid-upper arm (muscle wasting) B) Y-axis WHZ score (low weight for height (wasting) a  
558 measure of acute malnutrition C) Y axis WAZ score (low weight for age) a measure of acute and  
559 chronic malnutrition and D) BAZ (body mass index for age)

560

561

562

563



564 **Fig 1 COHORT diagram.** Study subjects, collected samples and new infection numbers

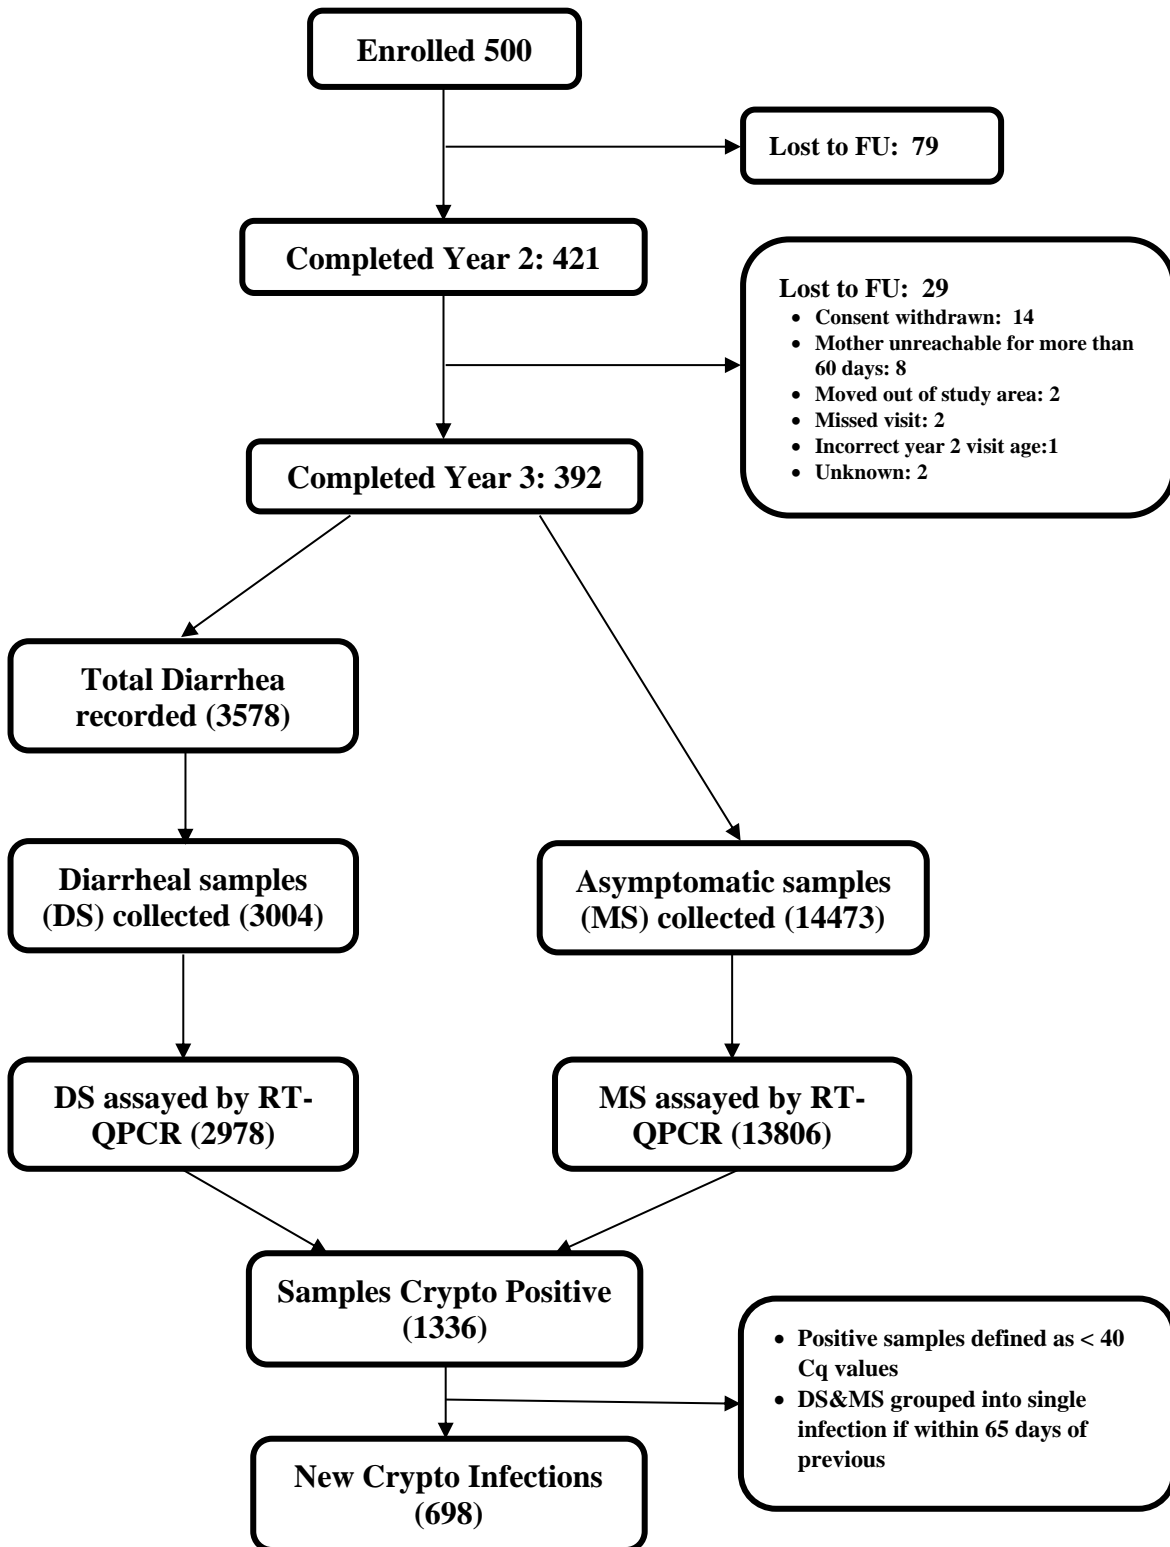

565 Abbreviations: RT-QPCR quantitative polymerase chain reaction; DS: Diarrheal samples; FU:  
 566 Follow-up; MS: Monthly Samples, Cq: Cycle Quantification

567

568 Fig 2

571 A

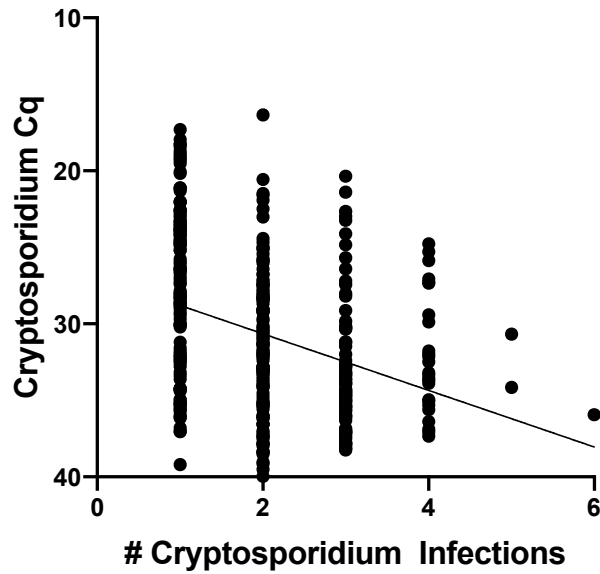

571 B

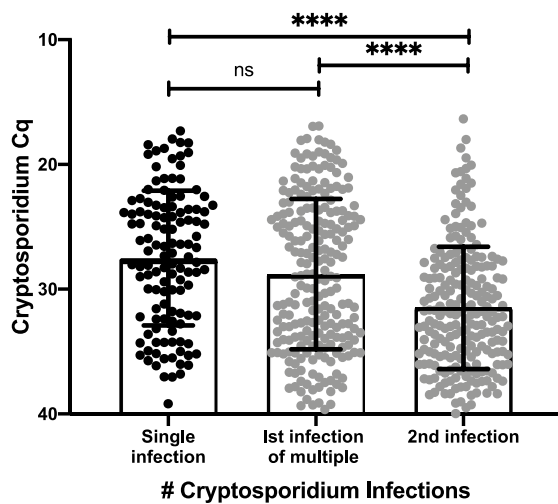

573 **Fig 2 Parasite burden was lower in recurrent infections**

574 **A)** Correlation between parasite burden and the number of *Cryptosporidium* infections. Each  
575 symbol represents the first detectable sample of an individual infection. Y-axis represents the  
576 quantitative cycle (Cq) of the diagnostic pan-Cryptosporidium PCR assay. X-axis shows the  
577 number of *Cryptosporidium* infections that had occurred in this child. The line represents the  
578 slope ( $-1.85 \pm 0.21$ ) and Y-intercept ( $26.95 \pm 0.44$ ) estimated from the GEE model with the  
579 exchangeable correlation structure ( $p < 0.0001$ )

580 **B)** Comparison of single infections (black symbol) with those that are part of a series (gray  
581 symbol). Bar graph (indicating data mean  $\pm$  standard deviation) with individual data points. Each  
582 symbol on the box plot represents the first positive sample of an individual infection. X-axis

583 refers to Infection number and, if the first infection, whether a second *Cryptosporidium* infection  
584 took place in the 3 years of life. Y-axis represents the quantitative cycle (Cq) of the diagnostic  
585 pan-Cryptosporidium PCR assay. Horizontal bar represents the result of a non-parametric  
586 Kruskal-Wallis test \*\*\*\* indicates  $p < 0.0001$   
587

588 Fig 3

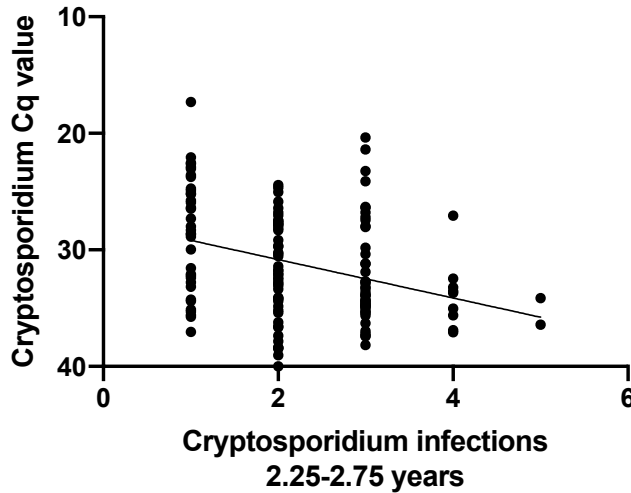

589  
590  
591  
592  
593  
594  
595  
596  
597

**Fig 3 Parasite burden in older children**

The amount of parasite in stool as a function of the number of cryptosporidia infections in a given child by linear regression. The analysis was restricted to children between 2.25 and 2.75 years of age (n=140). Each symbol represents the first detectable sample of an individual infection. Y-axis, quantitative cycle of the diagnostic pan-Cryptosporidium PCR assay (Cq). X-axis, the number of *Cryptosporidium spp.* infections that had occurred in each child. Slope: -1.65, R squared value: 0.01125, Significance  $p < 0.0001$ .

598

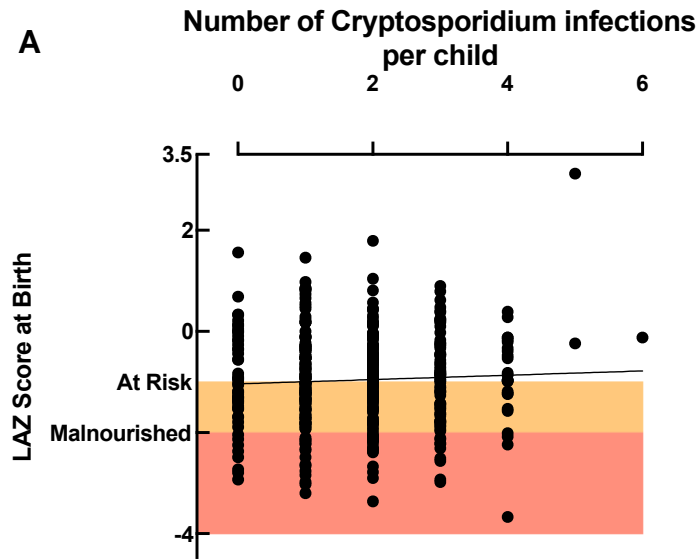

599

600

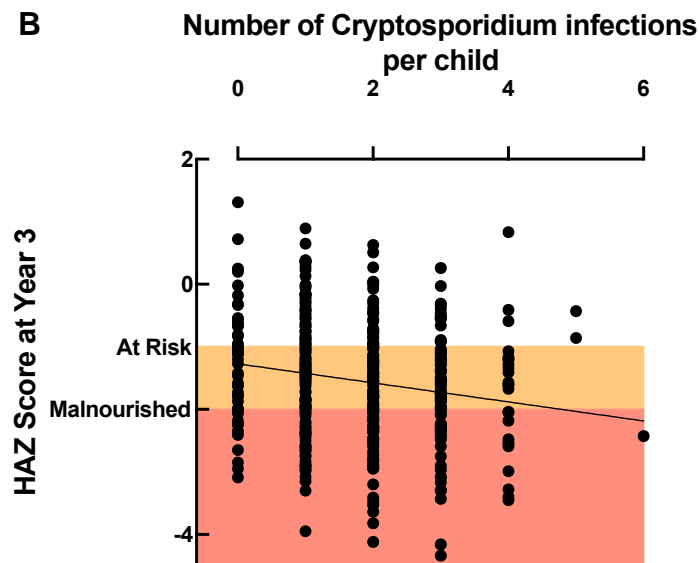

601

602 **Fig 4 Cryptosporidiosis frequency was associated with growth faltering distinct from the**  
603 **impact of birth nutritional status.**

604 A) Relationship between length for age z score (LAZ) at birth (Y-axis) and the total number of  
605 *Cryptosporidium spp.* infections (X-axis). The slope was not significantly different from one.

606 B) Relationship between height for age z score (HAZ) at 3 years (Y-axis) and the total number  
607 of *Cryptosporidium spp.* infections (X-axis). Slope:  $-0.152 \pm 0.0429$ , R squared value: 0.0313,

608 Significance  $p=0.0004$ . Children were defined to be at risk for growth faltering with a LAZ or  
609 HAZ score  $<-1$  and malnourished at LAZ or HAZ score  $<-2$ . Orange box: birth LAZ or 3 year

610 HAZ score  $-1$  to  $-2$  ; red box: birth LAZ or 3 year HAZ or score  $<-2$ .

611

612

613 **Fig 5 Correlates of cryptosporidiosis-associated growth-faltering**

614 A) Correlation matrix of cryptosporidiosis, all-cause diarrhea, LAZ at birth and HAZ at 3  
615 years, calculated using Pearson r. Bar on the right indicates strength and direction of  
616 association. B) Comparison of three year-HAZ with birth LAZ. (Slope:  $-0.294 \pm 0.05$ ; R  
617 squared value: 0.08; Significance  $p < 0.0001$ ) C) Relationship of all-cause diarrhea with  
618 HAZ at 3 years of age ( $p = \text{NS}$ ).  
619

A

620  
621

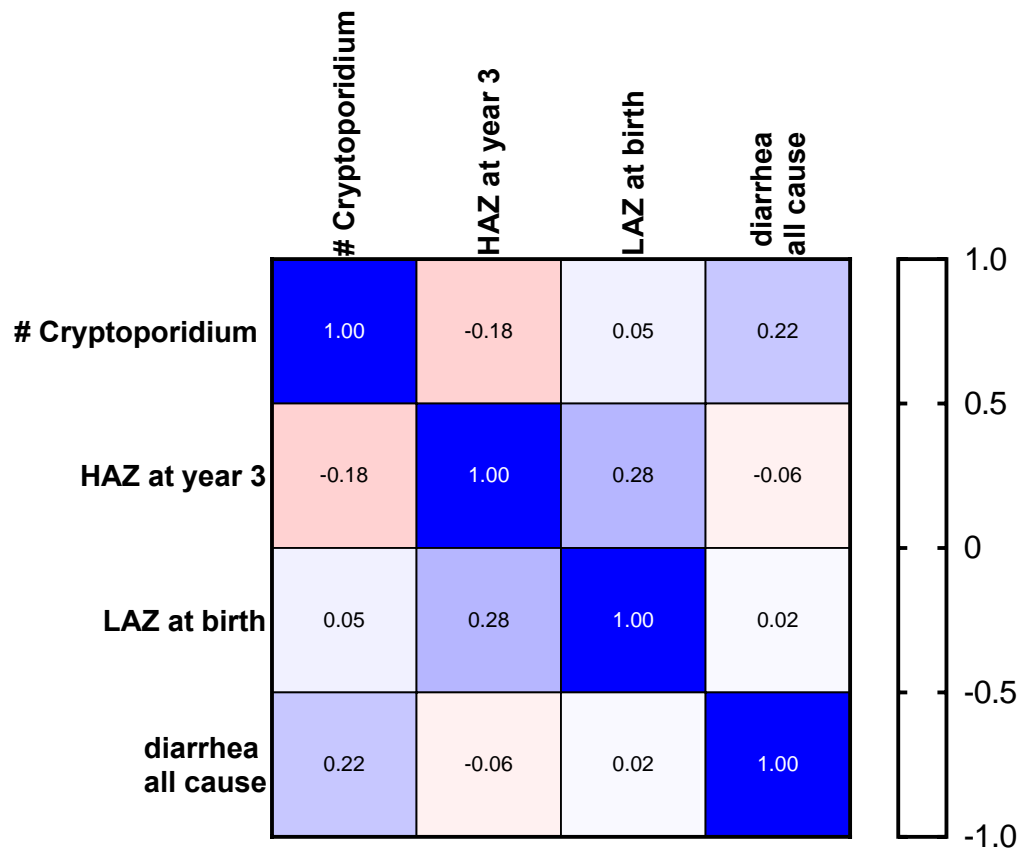

622  
623  
624

625  
626

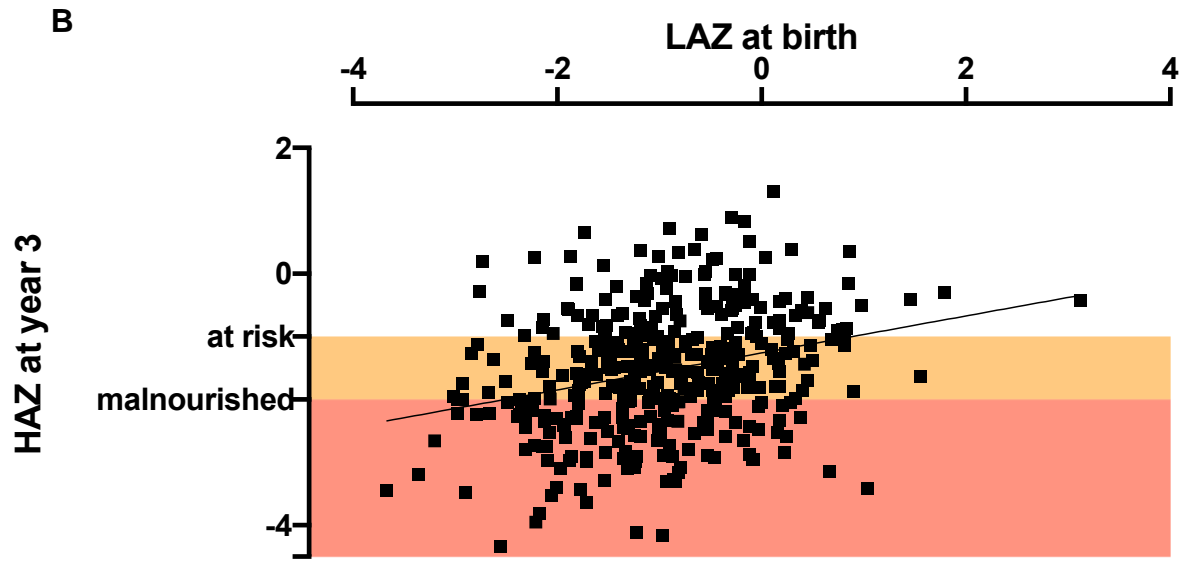

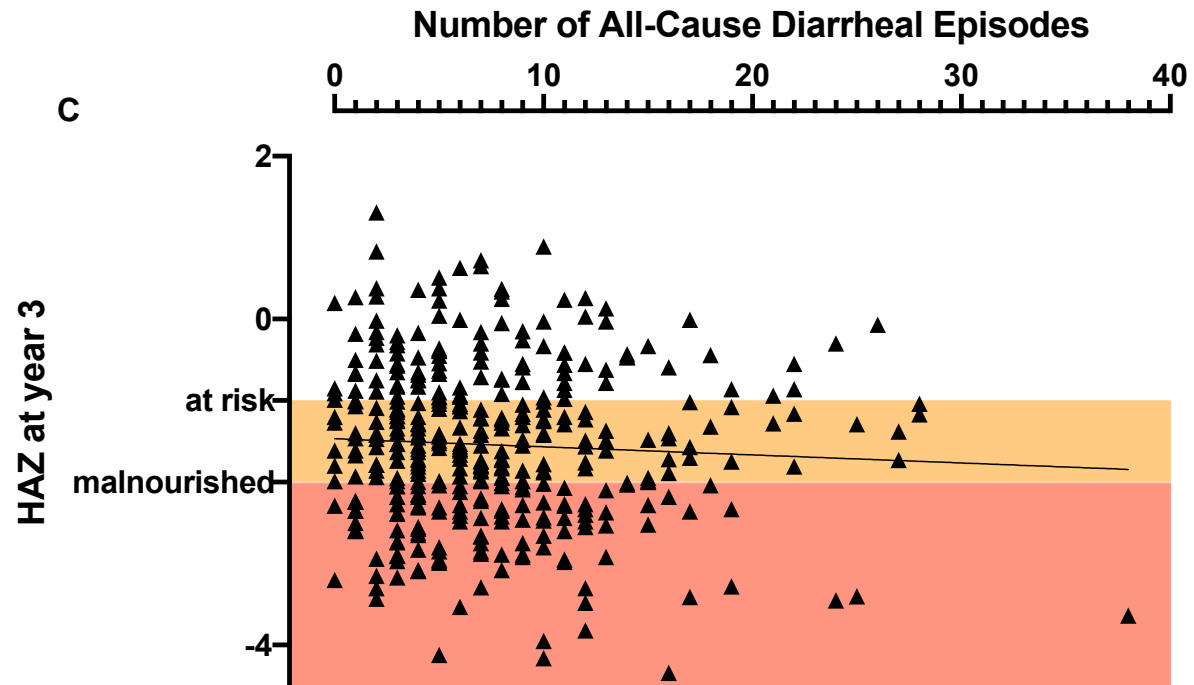

628





630 **Fig 6 High anti-Cp23 IgA levels were associated with a reduction in cryptosporidiosis-**  
631 **associated growth-faltering.**

632 Group 1 and 2 children were in the upper and lower 50th percentile for fecal IgA anti-Cp23  
633 respectively. HAZ are shown for children in both year one and year three of life. Mean  $\pm$   
634 standard deviation with individual data points. Horizontal bars represent the result of a non-  
635 parametric Kruskal-Wallis test \*\*\* $p < 0.001$ , \*\* $p < 0.01$

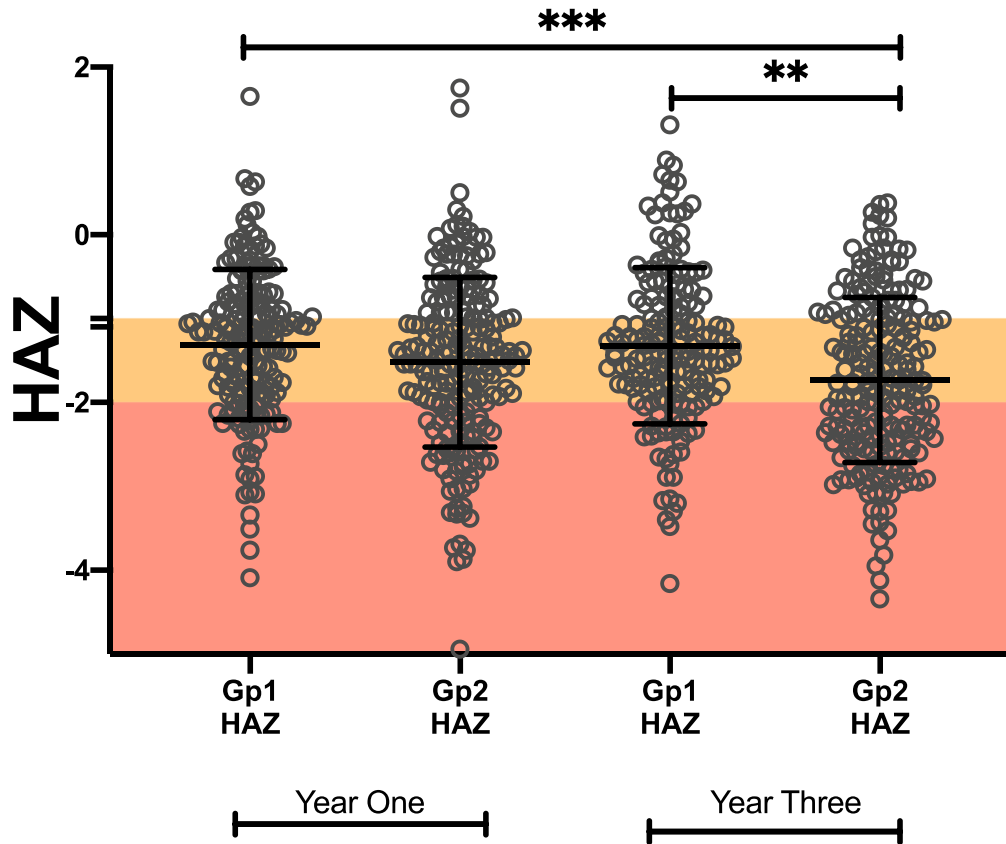

636

637

638

639

640 **Supporting information**

641

642 **Table S1 Symptomatic and asymptomatic samples collected and assayed by RT-QPCR**  
643 **during year 2 and year 3 follow-up period**

| <b>Sample Type</b>   | <b>Total Diarrhea Recorded</b> | <b>Samples Collected</b> | <b>Samples not Collected</b> | <b>RT_QPCR Assay</b> | <b>Sample not Assayed</b> |
|----------------------|--------------------------------|--------------------------|------------------------------|----------------------|---------------------------|
| <b>Year 2</b>        |                                |                          |                              |                      |                           |
| <b>Symptomatic</b>   | 3763                           | 3148 (83.66%)            | <b>615</b>                   | 3132                 | <b>16 (0.5%)</b>          |
| <b>Sub-clinical*</b> | NA                             | 15312 (97.58%)           | <b>318</b>                   | 14638                | <b>674 (4.4%)</b>         |
| <b>Year3</b>         |                                |                          |                              |                      |                           |
| <b>Symptomatic</b>   | 3578                           | 3148 (83.96%)            | <b>574</b>                   | 2978                 | <b>26 (0.9%)</b>          |
| <b>Sub-clinical*</b> | NA                             | 14473 (97.94%)           | <b>305</b>                   | 13806                | <b>667(4.6%)</b>          |

644

645

**\*Monthly Stool Samples**

646  
647  
648  
649  
650

**Table S2. Regression Analysis using selected predictors to test the association of all cause diarrhea and HAZ at year 3**

| <b>Parameter</b>                | <b>Effect (95% Confidence Interval)</b> | <b>P Value</b> |
|---------------------------------|-----------------------------------------|----------------|
| All cause diarrhea <sup>#</sup> | -0.008 (-0.023, 0.008)                  | 0.3357         |
| Child LAZ at Birth              | 0.245 (0.151, 0.339)                    | <0.0001        |
| Maternal Weight                 | 0.017 (0.007, 0.027)                    | 0.001          |
| Maternal Height                 | 0.037 (0.019, 0.056)                    | 0.0001         |
| Maternal Education              | 0.233 (0.020, 0.446)                    | 0.0323         |
| Household income                | 0.001 (0.000, 0.002)                    | 0.079          |
| Treated water                   | 0.205 (-0.003, 0.413)                   | 0.0537         |

651 # diarrheal episodes (all-cause) were not significantly associated with HAZ at year 3  
652  
653

654 Table S1: **Symptomatic and asymptomatic samples collected during year 3**  
655 Table S2: **Multivariable analysis of total all-cause diarrhea and HAZ at year 3**  
656 Fig S1: **Flow chart of stool processing and molecular testing**  
657 Fig S2: **Flow chart of stool TNA extraction procedure using QIAamp Fast DNA Stool Mini**  
658 **Kit from fresh or frozen stool samples.**  
659 Fig S3: **Flow chart of Multiplex qPCR of *Cryptosporidium*, *Giardia*, *Entamoeba histolytica***  
660 **by targeting the 18S gene**  
661 Fig S4 **Parasite burden in diarrheal and sub-clinical infections**  
662 Fig S5 **Distribution of repeated *Cryptosporidium* infections**  
663 Fig S6 **Recurrent cryptosporidiosis results in greater growth faltering**  
664 Fig S7: **Comparison of cryptosporidiosis associated growth-faltering in diarrheal and**  
665 **sub-clinical infections**  
666 Fig S8 **Cryptosporidiosis was associated with chronic but not acute malnutrition at year**  
667 **3**  
668 Fig S9 **Low anti-Cryptosporidium IgA levels after an infection were associated with a**  
669 **subsequent increase in cryptosporidiosis-associated growth-faltering**  
670

671 **Fig S1: Flow chart of stool processing and molecular testing**

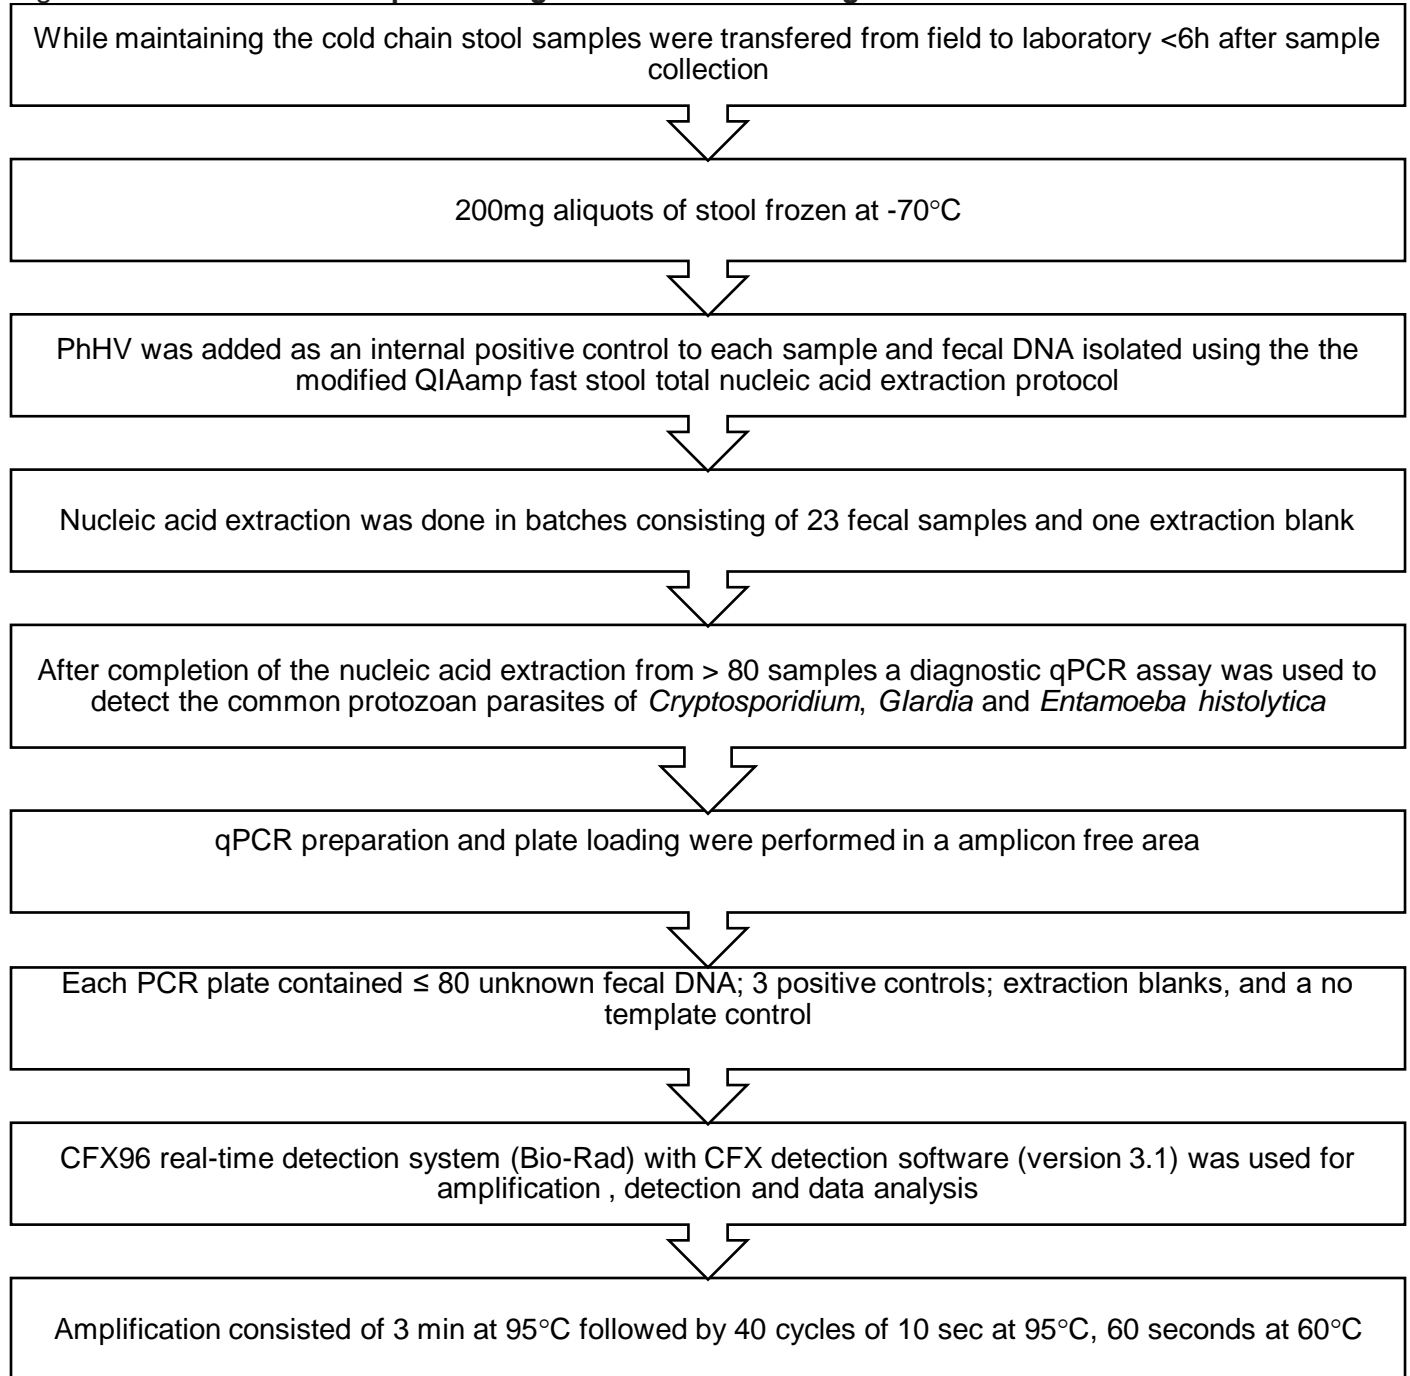

672  
673

674 Fig S2: Flow chart of stool TNA Extraction procedure using QIAamp Fast DNA Stool Mini  
675 Kit from fresh or frozen stool samples.

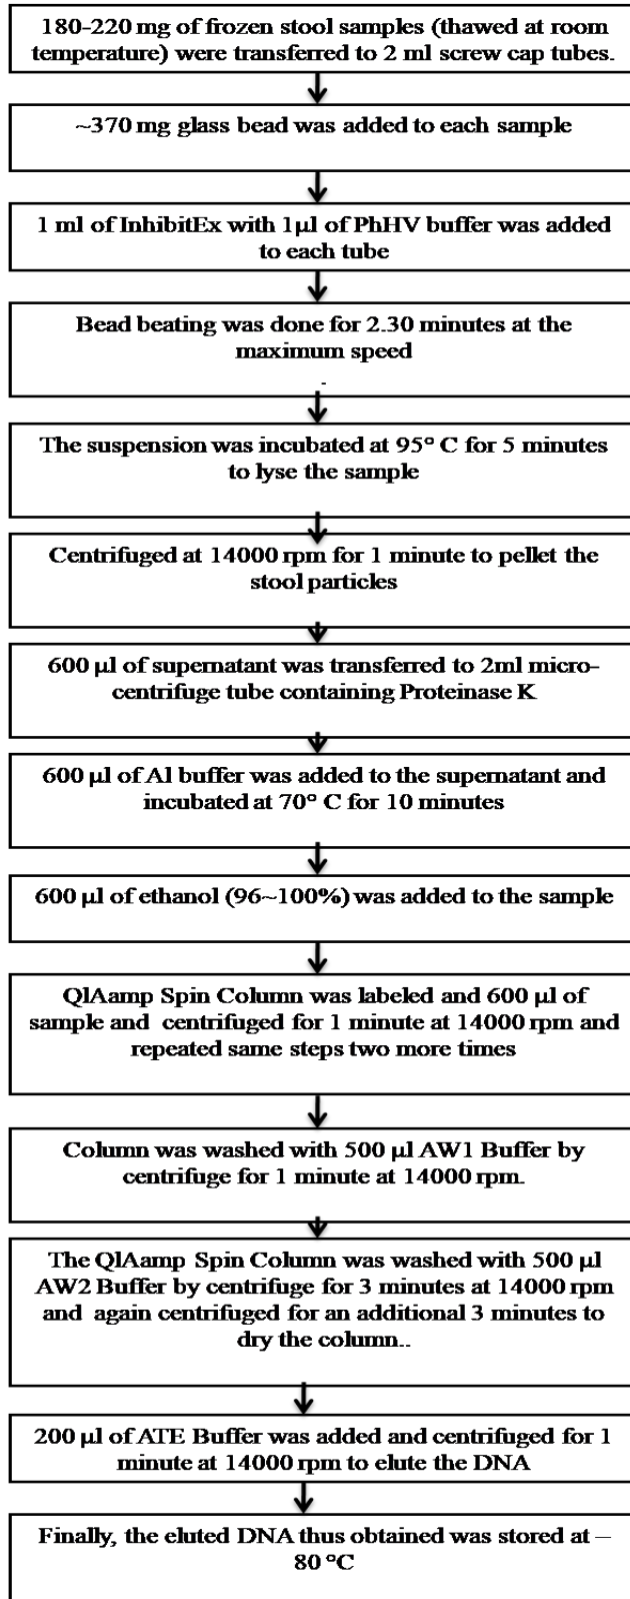

676

677 Fig S3: Flow chart of Multiplex qPCR of *Cryptosporidium*, *Giardia*, *Entamoeba histolytica*  
678 by targeting the 18S gene  
679

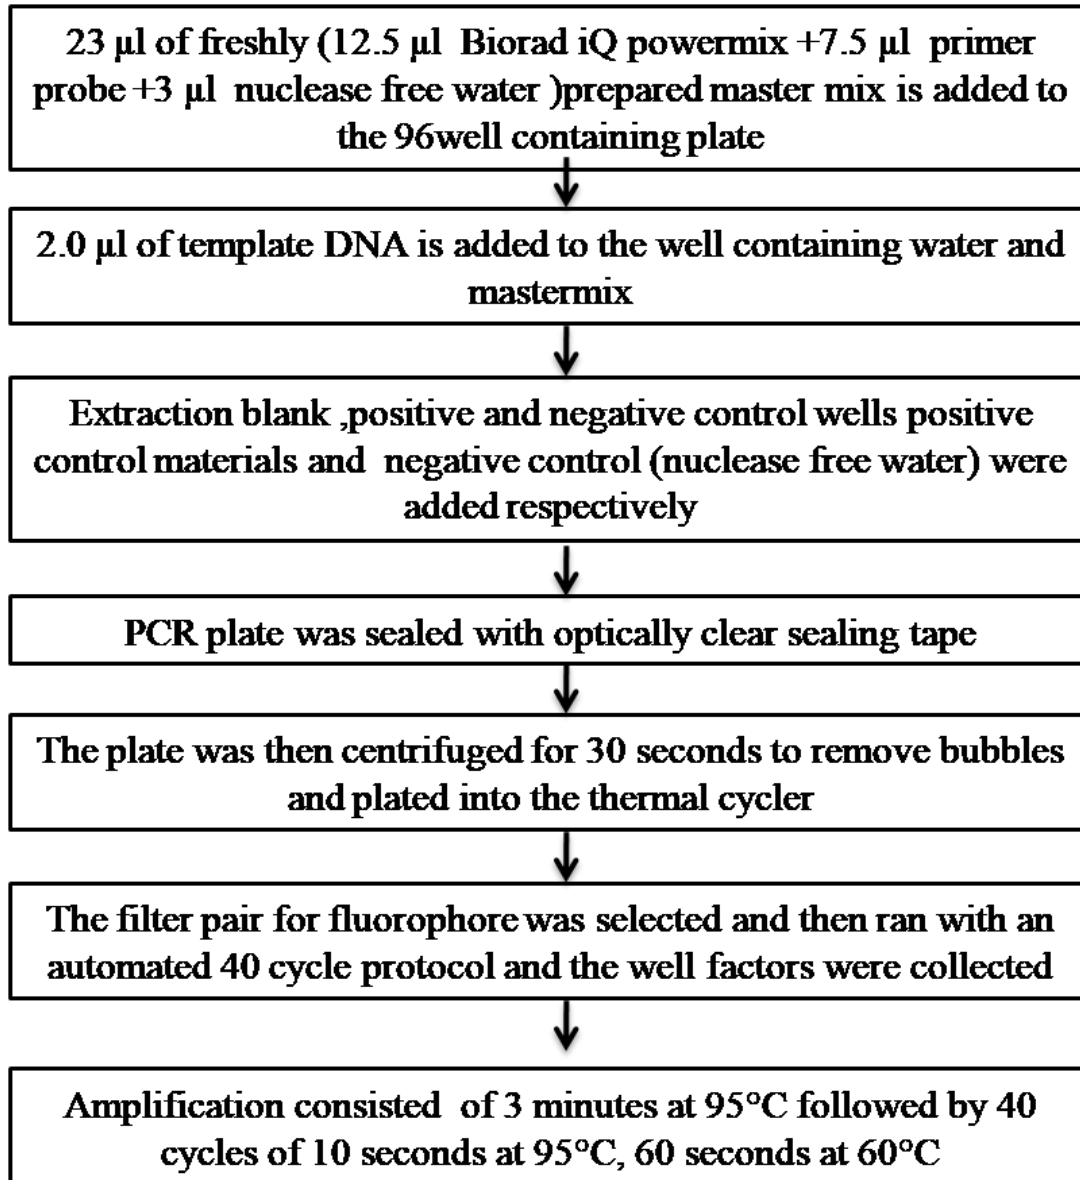

680  
681



682 **Fig S4. Parasite burden in diarrheal and sub-clinical infections**

683 Relationship between Parasite Burden and the number of recurrent *Cryptosporidium* infections.  
684 Each symbol represents the first detectable sample of an individual infection. Y-axis,  
685 quantitative cycle of the diagnostic pan-Cryptosporidium PCR assay (Cq). X-axis, the total  
686 number of *Cryptosporidium* infections. The infection was designated as either diarrheal (red) or  
687 sub-clinical (green) based on the current infection phenotype. The data from diarrheal cases  
688 was offset to improve data visualization. To account for within-child correlations among  
689 repeated *Cryptosporidium* infections, the generalized estimating equation (GEE) method for  
690 repeated measurements were used with exchangeable correlation structure. As the intercept of  
691 the diarrheal and sub-clinical models was not statistically different the common intercept ( $27.02 \pm 0.45$ )  
692 was used. The slope of the data derived from the sub-clinical ( $1.9 \pm 0.2$ ) and diarrheal  
693 ( $1.49 \pm 0.31$ ) exchangeable models were not significantly different from each other ( $p=0.071$ )  
694 although both were statistically different from zero ( $p<0.0001$ ).

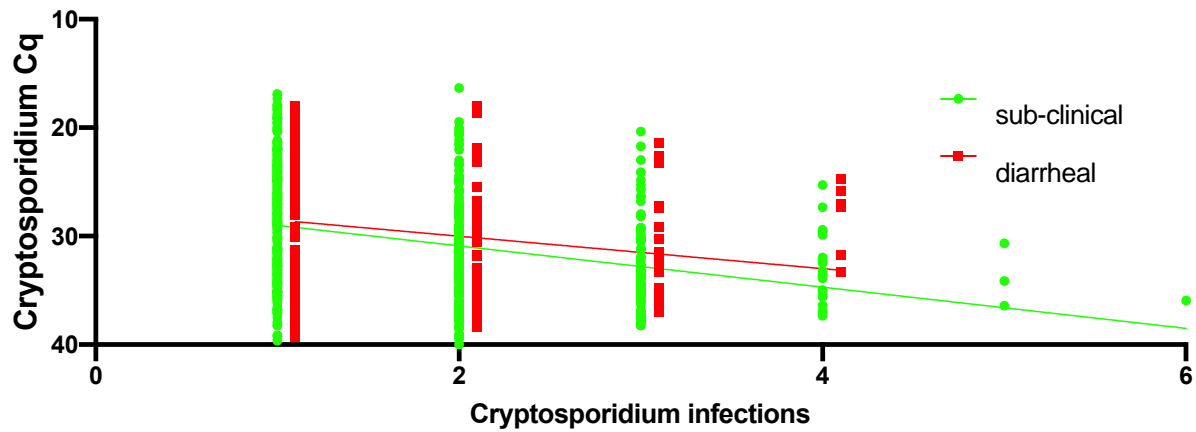

695  
696  
697  
698

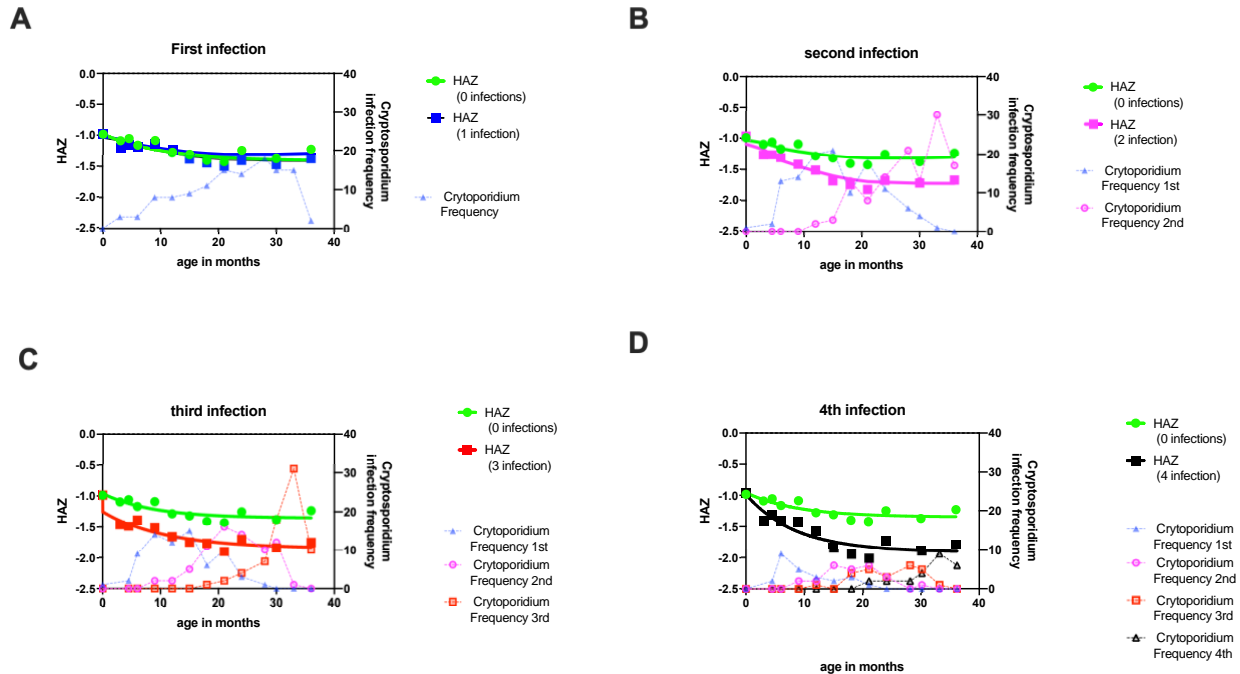

699  
700  
701  
702  
703  
704  
705  
706  
707  
708  
709  
710  
711  
712

**Fig S5. Distribution of repeated *Cryptosporidium* infections**

X axis child age in months; left y-axis child HAZ scores; right y-axis frequency of *Cryptosporidium* (diarrheal and sub-clinical) infections (shown as the number that occurred per the age of the child in months). All graphs include as a reference the HAZ score of children where no *Cryptosporidium* infections were detected (green circle and line). *Cryptosporidium* infections: Light blue triangle dotted blue connection line: infection one; purple circle and dotted line: infection two; light red square and dotted line: infection three; black triangle and dotted line: infection four A) blue symbol and solid line HAZ score of children who had one *Cryptosporidium* infections by 3 years of age B) purple square and solid line HAZ score of children who had two *Cryptosporidium* infections by three years of age C) red square and solid line HAZ score of children who had three *Cryptosporidium* infections by three years of age D) black square and solid line HAZ score of children who had four *Cryptosporidium* infections by three years of age

713  
714  
715

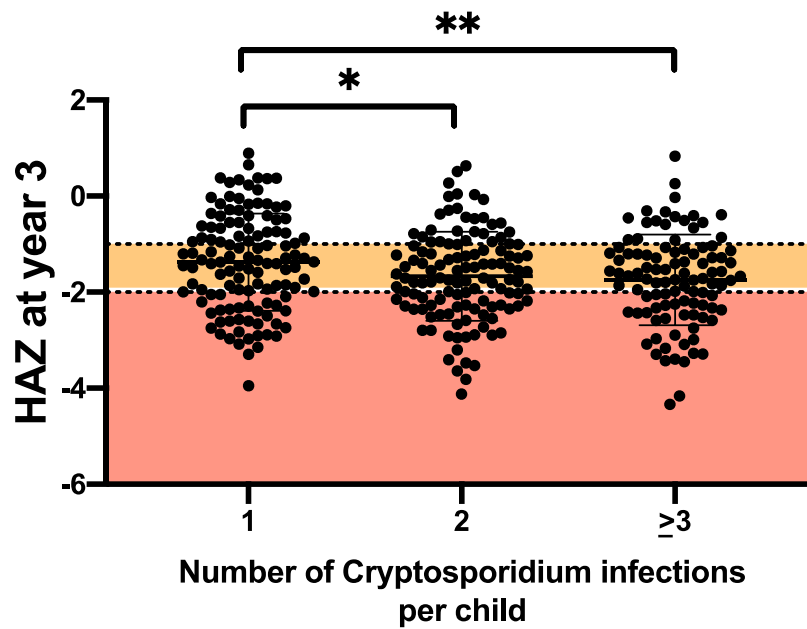

716

717 **Fig S6. Recurrent cryptosporidiosis results in greater growth faltering** Each symbol  
718 represents a single child. Box plot comparing the height for age z score at 3 years (HAZ) (Y-  
719 axis) mean and standard deviation shown Children are considered to be at Risk for malnutrition  
720 is they have a HAZ score <-1 and malnourished at HAZ<-2: orange box: 3-year HAZ score -1 to  
721 -2; red box 3-year HAZ score < -2. X-axis Number of Cryptosporidium infections. Bar indicates  
722 the result of a non-parametric Kruskal-Wallis test for multiple comparisons \* indicates  $p < 0.05$  \*\*  
723 indicates  $p < 0.01$   
724

725

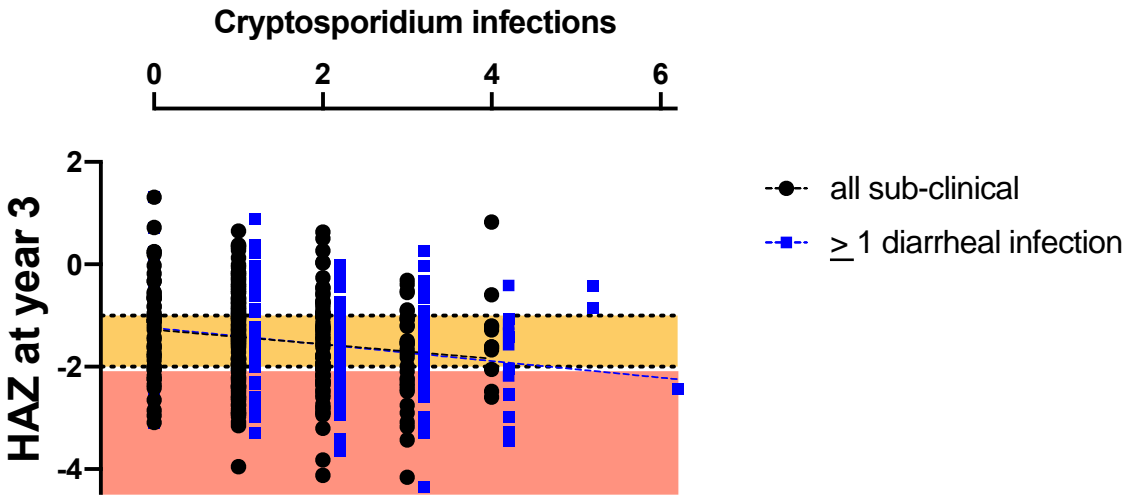

726

727 Fig S7: Comparison of cryptosporidiosis associated growth-faltering in diarrheal and  
728 sub-clinical infections

729 Graphs show results from a simple linear regression with each symbol representing a single child.  
730 Black symbols represent children who were never infected or had sub-clinical infections. The  
731 blue symbols indicate children who have had one or more than one episodes of diarrhea-  
732 associated cryptosporidiosis. Height for age (HAZ) z score at 3 years is shown on the Y-axis. The  
733 slope of the diarrheal-associated and sub-clinical groups are identical. Pooled Slope: -0.1545.  
734 Children are considered to be at Risk for malnutrition if they have a HAZ score <-1 and  
735 malnourished at HAZ -2: orange box: 3-year HAZ score -1 to -2 ; red box: 3-year HAZ score < -  
736 2. X-axis indicates number of *Cryptosporidium* infections  
737

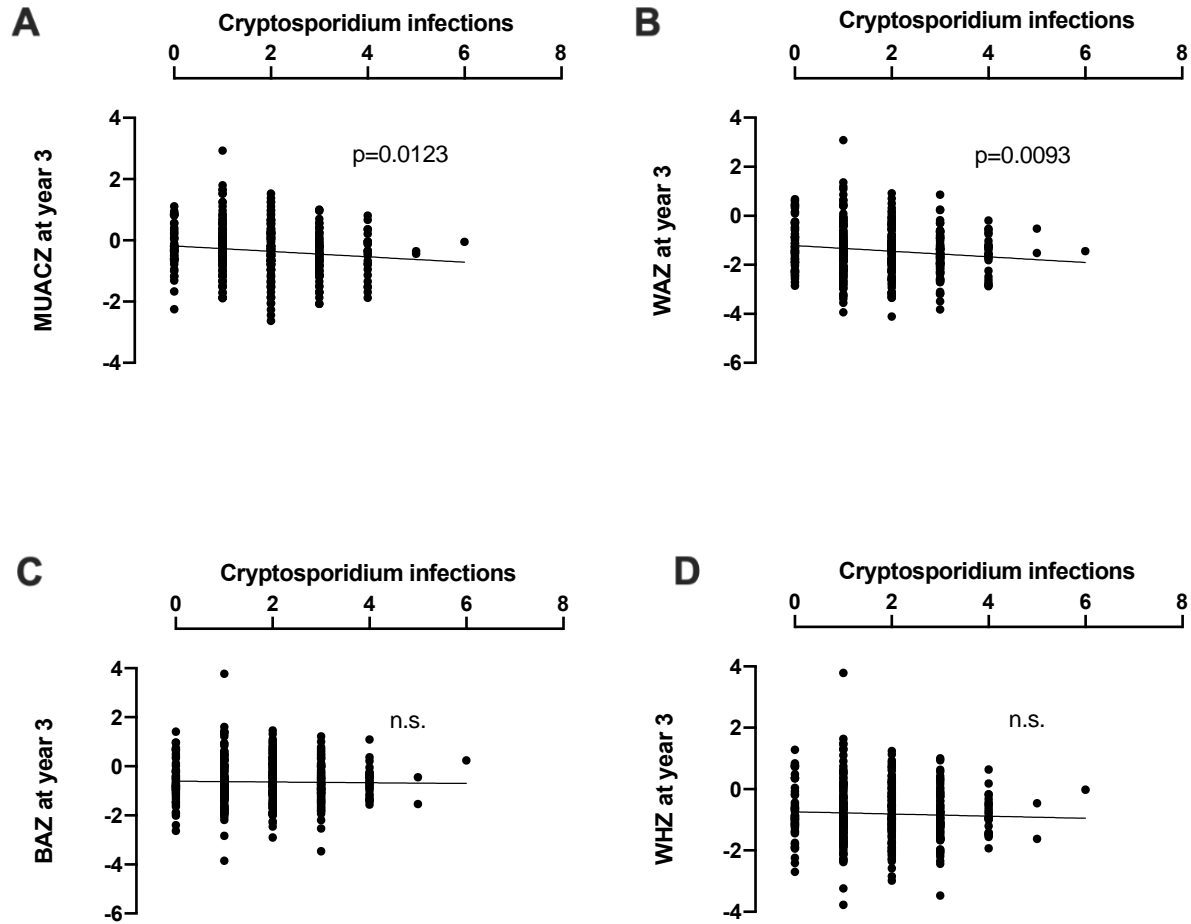

738  
739  
740  
741  
742  
743  
744  
745  
746  
747  
748  
749  
750

Fig S8. **Cryptosporidiosis was associated with chronic but not acute malnutrition at year 3.**

Graphs show results from a simple linear regression with each symbol representing a single child X-axis indicates number of *Cryptosporidium* infections A) Y-axis MUACZ circumference of the mid-upper arm (muscle wasting) B) Y-axis WAZ score (low weight for age) a measure of acute and chronic malnutrition C) Y-axis BAZ (body mass index for age) D) Y-axis WHZ score (low weight for height: wasting) a measure of acute malnutrition

751 Fig S9. **Low anti-Cryptosporidium IgA levels after an infection were associated with a**  
752 **subsequent increase in cryptosporidiosis-associated growth-faltering**  
753 Bar graphs (indicating data mean  $\pm$  standard deviation) with individual data points. Each symbol  
754 on the box plot represents a child. On the X-axis values are shown for children in Groups 1 and  
755 2 in both year one and year 3. Groups on the X-axis refers to the values obtained the end of the  
756 first and third years of life. Y-axis represents the growth faltering (HAZ). Horizontal bars  
757 represent the result of a non-parametric Kruskal-Wallis test \*\*\* indicates  $p < 0.001$  \*\* indicates  
758  $p < 0.01$  \*  $p < 0.05$   
759

760 A) Group 1 children had higher than average levels of fecal anti-IgA Cp23. Group2a children  
761 were negative by diagnostic surveillance by qPCR and anti-Cp23 antibodies at year one  
762 Group2b were positive by qPCR but had nevertheless low levels of anti-Cp23 antibodies.

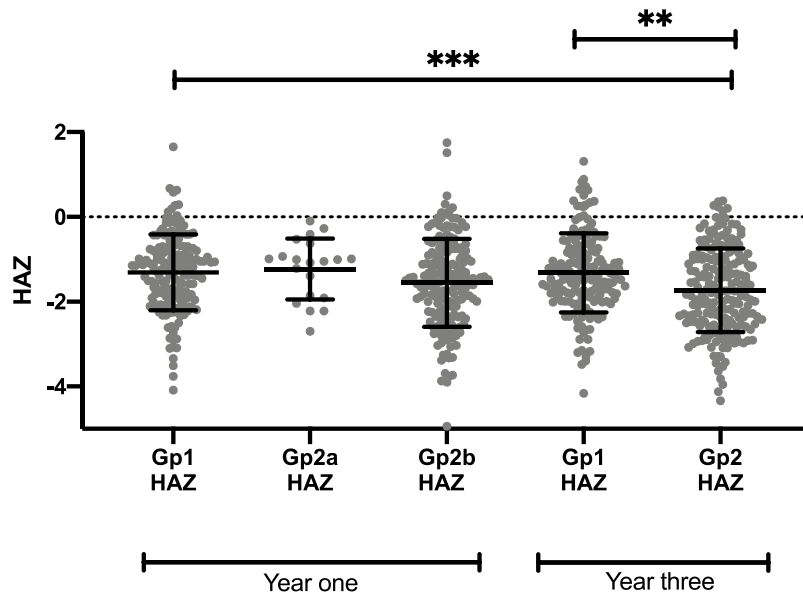

763 B) Group 1 children had higher than average levels of fecal anti-IgA Cp17. Group2a children  
764 were negative by diagnostic surveillance by qPCR and anti-Cp17 antibodies at year one  
765 Group2b were positive by qPCR but had nevertheless low levels of anti-Cp17 antibodies.  
766  
767

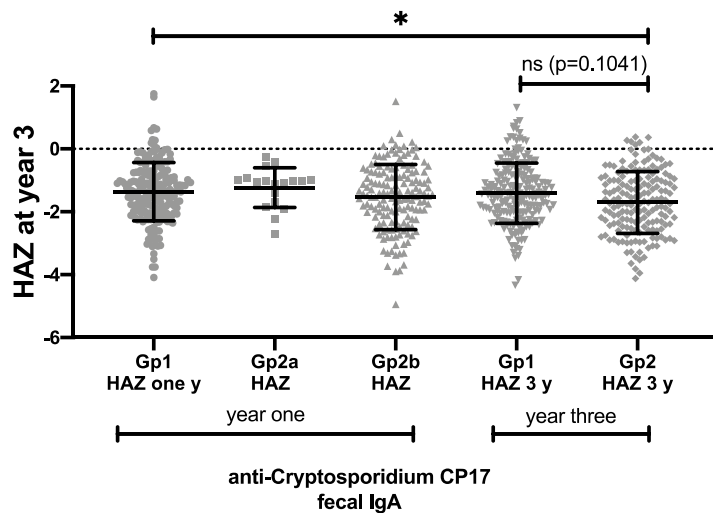

768
